# Supplementary material for: Sequential Sonogashira/intramolecular aminopalladation/cross-coupling of ortho-ethynyl-anilines catalyzed by a single palladium source: rapid access to 2,3-diarylindoles
Source: Royal Society of Chemistry journal article supplement (doi:10.1039/d0ob02295k), 2021-01-01

## Electronic Supplementary Information

### **Sequential Sonogashira/intramolecular aminopalladation/cross-coupling of *ortho*-ethynyl-anilines catalyzed by a single Palladium source: rapid access to 2,3-diarylindoles**

Jiwei Wang,<sup>a,b</sup> Gendi Wang,<sup>b</sup> Xiang Cheng,<sup>b</sup> Ye Liu,<sup>\*a</sup> and Jun Zhang<sup>\*b</sup>

<sup>a</sup>Key Laboratory of Green Chemistry and Chemical Processes, School of Chemistry & Molecular Engineering, East China Normal University, 3663 North Zhongshan Road, Shanghai 200062 (China)

<sup>b</sup>Key Laboratory for Advanced Materials and Joint International Research Laboratory of Precision Chemistry and Molecular Engineering, Feringa Nobel Prize Scientist Joint Research Center, School of Chemistry and Molecular Engineering, East China University of Science and Technology, 130 Meilong Road, Shanghai 200237 (China)

## General Information:

Unless otherwise stated, all reactions and manipulations were performed using standard Schlenk techniques. All solvents were purified by distillation using standard methods. Commercially available reagents were used without further purification. NMR spectra were recorded by using a Bruker 400 MHz spectrometer. Chemical shifts are reported in ppm from tetramethylsilane with the solvent resonance as the internal standard ( $^1\text{H}$  NMR  $\text{CDCl}_3$ : 7.26 ppm;  $^{13}\text{C}$  NMR  $\text{CDCl}_3$ : 77.0 ppm). Mass spectra were recorded on the HP-5989 instrument by EI/ESI methods.

## Preparation and characterization

### General procedure A for the synthesis of *o*-ethynyltrifluoroacetanilides **1a-1e**:

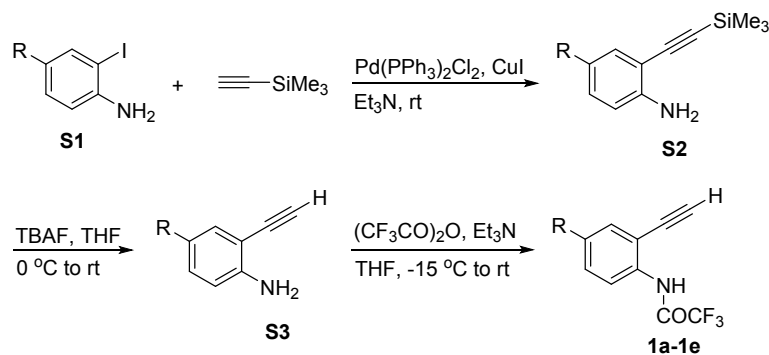

The mixture of **S1** (10 mmol),  $\text{CuI}$  (95 mg, 0.5 mmol),  $\text{Pd}(\text{PPh}_3)_2\text{Cl}_2$  (210 mg, 0.3 mmol) under a nitrogen atmosphere was added anhydrous  $\text{Et}_3\text{N}$  (10 mL) and trimethylsilyl acetylene (1.47 g, 15 mmol) in order and the solution was stirred at room temperature. The reaction was monitored by TLC and after completion, then the crude product was purified by silica gel column chromatography (v/v, PE/EtOAc = 200:1) to afford pure **S2** as oil.

The solution of **S2** (5.0 mmol) in THF (20 mL) was added tetrabutylammonium fluoride (1.96 g, 7.5 mmol) at  $0\text{ }^\circ\text{C}$ , then the mixture was stirred at room temperature for 5 min. The reaction was monitored by TLC and after completion, the reaction mixture was extracted with EtOAc (10 mL  $\times$  3) and washed with brine (10 mL). The combined organic layer was dried over  $\text{MgSO}_4$ , and then concentrated in vacuum to afford crude **S3** as oil.

The solution of **S3** (5.0 mmol) in THF (20 mL) was added  $\text{Et}_3\text{N}$  (759 mg, 1.04 mL, 7.5 mmol) at  $-15\text{ }^\circ\text{C}$ , followed by dropwise addition of trifluoroacetic anhydride (1.26 g, 6.0 mmol). After stirring for 1 h at  $-15\text{ }^\circ\text{C}$  and then overnight at room temperature, the mixture was extracted with EtOAc (10 mL  $\times$  3). The combined organic layer was dried over  $\text{MgSO}_4$ , then the crude product was purified by silica gel column chromatography (PE) to afford pure **1a-1e** as solid.

### ***N*-(2-ethynylphenyl)-2,2,2-trifluoroacetamide (1a)**

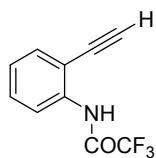

Following the general procedure A, **1a** was purified by silica gel chromatography (v/v, PE/EtOAc = 300:1) as a purple solid (2.0 g, 94 %). <sup>1</sup>H NMR (400 MHz, CDCl<sub>3</sub>) δ = 8.75 (brs, 1H), 8.36 (d, *J* = 8.4 Hz, 1H), 7.53 (dd, *J* = 7.6, 1.2 Hz, 1H), 7.46-7.41 (m, 1H), 7.19 (td, *J* = 7.6, 1.2 Hz, 1H), 3.61 (s, 1H). Our data was in full agreement with previous reported in the literature.<sup>1</sup>

### ***N*-(2-ethynyl-4-methylphenyl)-2,2,2-trifluoroacetamide (1b)**

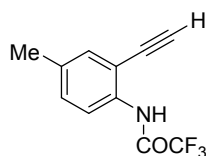

Following the general procedure A, **1b** was purified by silica gel chromatography (v/v, PE/EtOAc = 300:1) as a brown solid (1.63 g, 68 %). <sup>1</sup>H NMR (400 MHz, CDCl<sub>3</sub>) δ = 8.67 (brs, 1H), 8.22 (d, *J* = 8.4 Hz, 1H), 7.33 (d, *J* = 1.2 Hz, 1H), 7.24 (d, *J* = 8.4 Hz, 1H), 3.56 (s, 1H), 2.33 (s, 3H). <sup>13</sup>C NMR (100 MHz, CDCl<sub>3</sub>) δ = 154.3 (q, *J* = 37.1 Hz), 135.3, 134.3, 132.5, 131.0, 119.5, 117.1, 114.2, 112.0, 85.2 (d, *J* = 2.8 Hz), 78.0, 20.6 (d, *J* = 1.6 Hz). <sup>19</sup>F NMR (376 MHz, CDCl<sub>3</sub>) δ = -75.9. HRMS (ESI): *m/z* [M-H]<sup>-</sup> calcd. for C<sub>11</sub>H<sub>7</sub>F<sub>3</sub>NO<sup>-</sup>: 226.0480; Found: 226.0480.

### ***N*-(2-ethynyl-4-fluorophenyl)-2,2,2-trifluoroacetamide (1c)**

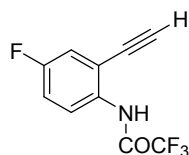

Following the general procedure A, **1c** was purified by silica gel chromatography (v/v, PE/EtOAc = 300:1) as a pale pink solid (1.6 g, 70 %). <sup>1</sup>H NMR (400 MHz, CDCl<sub>3</sub>) δ = 8.65 (brs, 1H), 8.34 (dd, *J* = 9.2, 4.8 Hz, 1H), 7.23 (dd, *J* = 8.4, 2.8 Hz, 1H), 7.15 (ddd, *J* = 9.6, 7.6, 3.2 Hz, 1H), 3.65 (s, 1H). <sup>13</sup>C NMR (100 MHz, CDCl<sub>3</sub>) δ = 160.4, 157.9, 154.5 (q, *J* = 37.5 Hz), 133.2 (d, *J* = 2.9 Hz), 121.6 (d, *J* = 8.4 Hz), 118.9 (d, *J* = 24.6 Hz), 117.6 (d, *J* = 22.3 Hz), 117.0, 114.1, 113.9 (d, *J* = 9.5 Hz), 86.6 (d, *J* = 3.2 Hz). <sup>19</sup>F NMR (376 MHz, CDCl<sub>3</sub>) δ = -75.9, -115.0. HRMS (ESI): *m/z* [M-H]<sup>-</sup> calcd. for C<sub>10</sub>H<sub>4</sub>F<sub>4</sub>NO<sup>-</sup>: 230.0229; Found: 230.0224.

### ***N*-(2-ethynyl-4-(trifluoromethyl)phenyl)-2,2,2-trifluoroacetamide (1d)**

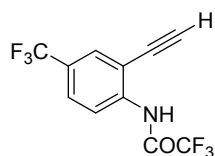

Following the general procedure A, **1d** was purified by silica gel chromatography (PE) as a brown solid (2.2 g, 78 %).  $^1\text{H}$  NMR (400 MHz,  $\text{CDCl}_3$ )  $\delta$  = 8.84 (brs, 1H), 8.53 (d,  $J$  = 8.8 Hz, 1H), 7.79 (s, 1H), 7.69 (dd,  $J$  = 8.8, 1.6 Hz, 1H), 3.71 (s, 1H).  $^{13}\text{C}$  NMR (100 MHz,  $\text{CDCl}_3$ )  $\delta$  = 154.9 (q,  $J$  = 37.9 Hz), 139.5, 129.4 (q,  $J$  = 3.8 Hz), 127.8, 127.4, 127.3 (q,  $J$  = 3.7 Hz), 124.5, 121.8, 119.7, 116.8, 113.9, 112.6, 87.3 (d,  $J$  = 3.6 Hz), 76.5.  $^{19}\text{F}$  NMR (376 MHz,  $\text{CDCl}_3$ )  $\delta$  = -62.7 (d,  $J$  = 2.6 Hz), -75.9 (d,  $J$  = 3.4 Hz). HRMS (ESI):  $m/z$   $[\text{M}-\text{H}]^-$  calcd. for  $\text{C}_{11}\text{H}_4\text{F}_6\text{NO}^-$ : 280.0197; Found: 280.0178.

#### ***N*-(4-cyano-2-ethynylphenyl)-2,2,2-trifluoroacetamide (1e)**

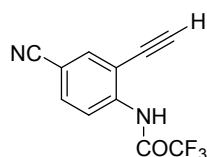

Following the general procedure A, **1e** was purified by silica gel chromatography (v/v, PE/EtOAc = 100:1) as a white solid (0.85 g, 60 %).  $^1\text{H}$  NMR (400 MHz,  $\text{CDCl}_3$ )  $\delta$  = 8.86 (brs, 1H), 8.55 (d,  $J$  = 8.8 Hz, 1H), 7.82 (d,  $J$  = 2 Hz, 1H), 7.72 (dd,  $J$  = 8.8, 1.6 Hz, 1H), 3.75 (s, 1H).  $^{13}\text{C}$  NMR (100 MHz,  $\text{CDCl}_3$ )  $\delta$  = 154.8 (q,  $J$  = 38.1 Hz), 140.1, 135.8, 134.0, 119.9, 117.2, 113.1, 109.3, 88.1 (d,  $J$  = 3.8 Hz), 75.7, 29.6.  $^{19}\text{F}$  NMR (376 MHz,  $\text{CDCl}_3$ )  $\delta$  = -75.8. HRMS (ESI):  $m/z$   $[\text{M}-\text{H}]^-$  calcd. for  $\text{C}_{11}\text{H}_4\text{F}_3\text{N}_2\text{O}^-$ : 237.0276; Found 237.0275.

#### **General procedure B for the synthesis of 2,3-diaryl indoles 3a-3u:**

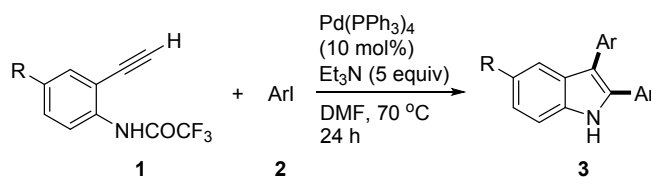

A nitrogen-filled round-bottom flask was charged with **1** (0.47 mmol),  $\text{Pd}(\text{PPh}_3)_4$  (54 mg, 0.047 mmol) and anhydrous DMF (3 mL), and then  $\text{Et}_3\text{N}$  (238 mg, 0.33 mL, 2.35 mmol) and aryl iodides **2** (2.35 mmol) were added in order. After the solution was stirred at 70 °C for 24 h, the reaction was quenched with water (3 mL) and the aqueous layer was extracted with DCM (10 mL  $\times$  3). The combined organic layer was dried over  $\text{MgSO}_4$ , the volatile was removed under vacuum, and then the resulting residue was purified by silica gel column chromatography (PE/EtOAc) to afford pure product **3a-3u**.

### 2,3-diphenyl-1H-indole (3a)

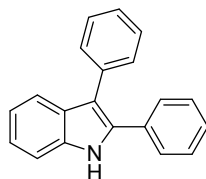

Following the general procedure B, **3a** was purified by silica gel chromatography (v/v, PE/EtOAc = 300:1) as a pale yellow solid (115 mg, 91 %). <sup>1</sup>H NMR (400 MHz, CDCl<sub>3</sub>)  $\delta$  = 8.24 (brs, 1H), 7.71 (d,  $J$  = 8.0 Hz, 1H), 7.48-7.37 (m, 7H), 7.37-7.30 (m, 4H), 7.29-7.24 (m, 1H), 7.20-7.15 (m, 1H). Our data was in full agreement with previous reported in the literature.<sup>2</sup>

### 2,3-di-*o*-tolyl-1H-indole (3b)

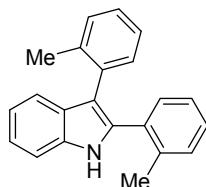

Following the general procedure B, **3b** was purified by silica gel chromatography (v/v, PE/EtOAc = 300:1) as a pale yellow solid (94 mg, 67 %). <sup>1</sup>H NMR (400 MHz, CDCl<sub>3</sub>)  $\delta$  = 8.15 (brs, 1H), 7.48-7.44 (m, 2H), 7.29 (d,  $J$  = 8.0 Hz, 2H), 7.25-7.13 (m, 8H), 2.14 (s, 3H), 2.08 (s, 3H). Our data was in full agreement with previous reported in the literature.<sup>2</sup>

### 2,3-di-*m*-tolyl-1H-indole (3c)

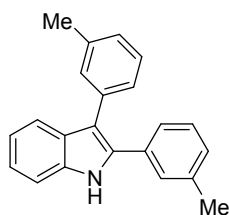

Following the general procedure B, **3c** was purified by silica gel chromatography (v/v, PE/EtOAc = 300:1) as a pale yellow solid (118 mg, 85 %). <sup>1</sup>H NMR (400 MHz, CDCl<sub>3</sub>)  $\delta$  = 8.24 (brs, 1H), 7.72 (d,  $J$  = 8.0 Hz, 1H), 7.50-7.38 (m, 2H), 7.35-7.26 (m, 3H), 7.25-7.21 (m, 6H), 2.39 (s, 3H), 2.35 (s, 3H). Our data was in full agreement with previous reported in the literature.<sup>3</sup>

### 2,3-bis(2-methoxyphenyl)-1H-indole (3d)

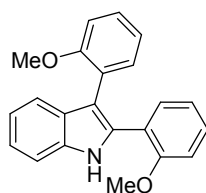

Following the general procedure B, **3d** was purified by silica gel chromatography (v/v, PE/EtOAc = 300:1) as a pale yellow solid (54 mg, 35 %).  $^1\text{H}$  NMR (400 MHz,  $\text{CDCl}_3$ )  $\delta$  = 9.19 (s, 1H), 7.50 (d,  $J$  = 8.0 Hz, 1H), 7.43 (d,  $J$  = 8.4 Hz, 1H), 7.37-7.29 (m, 2H), 7.25-7.19 (m, 3H), 7.12-7.07 (m, 1H), 7.02-6.95 (m, 3H), 6.78 (td,  $J$  = 7.6, 0.8 Hz, 1H), 3.90 (s, 3H), 3.57 (s, 3H).  $^{13}\text{C}$  NMR (100 MHz,  $\text{CDCl}_3$ )  $\delta$  = 157.3, 156.2, 135.3, 132.4, 132.0, 130.8, 128.5, 128.2, 127.9, 124.8, 122.0, 121.7, 120.7, 120.6, 119.9, 119.5, 111.6, 111.4, 111.2, 110.7, 55.7 (d,  $J$  = 4.5 Hz), 55.1 (d,  $J$  = 3.2 Hz). HRMS (ESI):  $m/z$   $[\text{M}+\text{H}]^+$  calcd. for  $\text{C}_{22}\text{H}_{20}\text{NO}_2^+$ : 330.1494; Found 330.1488.

### 2,3-bis(3-methoxyphenyl)-1H-indole (**3e**)

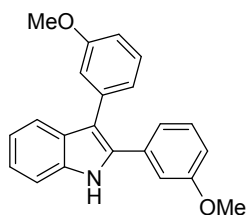

Following the general procedure B, **3e** was purified by silica gel chromatography (v/v, PE/EtOAc = 300:1) as a pale yellow solid (106 mg, 69 %).  $^1\text{H}$  NMR (400 MHz,  $\text{CDCl}_3$ )  $\delta$  = 8.27 (brs, 1H), 7.70 (d,  $J$  = 8.0 Hz, 1H), 7.44 (d,  $J$  = 8.0 Hz, 1H), 7.32-7.27 (m, 1H), 7.26-7.23 (m, 2H), 7.18-7.13 (m, 1H), 7.06-7.00 (m, 3H), 6.99-6.95 (m, 1H), 6.87-6.82 (m, 2H), 3.76 (s, 3H), 3.68 (s, 3H). Our data was in full agreement with previous reported in the literature.<sup>3</sup>

### 2,3-di-*p*-tolyl-1H-indole (**3f**)

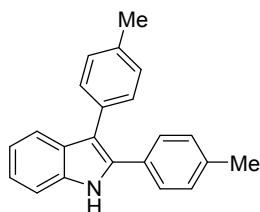

Following the general procedure B, **3f** was purified by silica gel chromatography (v/v, PE/EtOAc = 300:1) as a pale yellow solid (106 mg, 59 %).  $^1\text{H}$  NMR (400 MHz,  $\text{CDCl}_3$ )  $\delta$  = 8.19 (s, 1H), 7.67 (d,  $J$  = 7.6 Hz, 1H), 7.47-7.39 (m, 2H), 7.37-7.30 (m, 4H), 7.22-7.12 (m, 5H), 2.40 (s, 3H), 2.36 (s, 3H). Our data was in full agreement with previous reported in the literature.<sup>3</sup>

### 2,3-bis(4-methoxyphenyl)-1H-indole (3g)

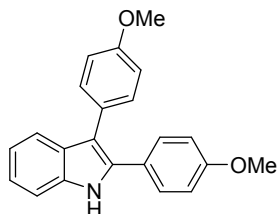

Following the general procedure B, **3g** was purified by silica gel chromatography (v/v, PE/EtOAc = 300:1) as a pale yellow solid (76 mg, 50 %).  $^1\text{H}$  NMR (400 MHz,  $\text{CDCl}_3$ )  $\delta$  = 8.18 (brs, 1H), 7.65 (d,  $J$  = 8.0 Hz, 1H), 7.42-7.34 (m, 5H), 7.23 (t,  $J$  = 7.4 Hz, 1H), 7.15 (t,  $J$  = 7.4 Hz, 1H), 6.95 (d,  $J$  = 8.0 Hz, 2H), 6.87 (d,  $J$  = 8.8 Hz, 2H), 3.86 (s, 3H), 3.82 (s, 3H). Our data was in full agreement with previous reported in the literature.<sup>3</sup>

### 2,3-bis(4-(trifluoromethyl)phenyl)-1H-indole (3h)

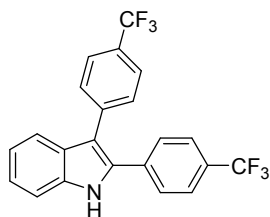

Following the general procedure B and the reaction was reacted for 48 h, **3g** was purified by silica gel chromatography (v/v, PE/EtOAc = 200:1) as a pale yellow solid (165 mg, 87%).  $^1\text{H}$  NMR (400 MHz,  $\text{CDCl}_3$ )  $\delta$  = 8.40 (brs, 1H), 7.69-7.60 (m, 5H), 7.55-7.47 (m, 5H), 7.34-7.29 (m, 1H), 7.23-7.19 (m, 1H). Our data was in full agreement with previous reported in the literature.<sup>4</sup>

### 2,3-bis(4-fluorophenyl)-1H-indole (3i)

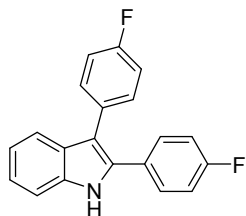

Following the general procedure B, **3i** was purified by silica gel chromatography (v/v, PE/EtOAc = 300:1) as a pale yellow solid (106 mg, 74 %).  $^1\text{H}$  NMR (400 MHz,  $\text{CDCl}_3$ )  $\delta$  = 8.20 (brs, 1H), 7.63 (d,  $J$  = 8.0 Hz, 1H), 7.44 (d,  $J$  = 8.0 Hz, 1H), 7.40-7.34 (m, 4H), 7.29-7.24 (m, 1H), 7.19-7.15 (m, 1H), 7.12-7.01 (m, 4H). Our data was in full agreement with previous reported in the literature.<sup>3</sup>

### 2,3-bis(4-chlorophenyl)-1H-indole (3j)

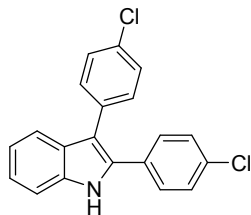

Following the general procedure B, **3j** was purified by silica gel chromatography (v/v, PE/EtOAc = 300:1) as a white solid (93 mg, 59 %). <sup>1</sup>H NMR (400 MHz, CDCl<sub>3</sub>)  $\delta$  = 8.24 (brs, 1H), 7.63 (d,  $J$  = 8.0 Hz, 1H), 7.44 (d,  $J$  = 8.4 Hz, 1H), 7.35 (dd,  $J$  = 9.4, 1.4 Hz, 8H), 7.29-7.25 (m, 1H), 7.17 (t,  $J$  = 7.4 Hz, 1H). Our data was in full agreement with previous reported in the literature.<sup>3</sup>

### 2,3-bis(4-bromophenyl)-1H-indole (3k)

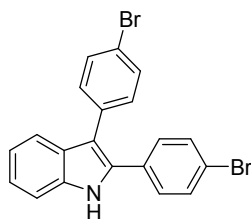

Following the general procedure B, **3k** was purified by silica gel chromatography (v/v, PE/EtOAc = 300:1) as a white solid (116 mg, 58 %). <sup>1</sup>H NMR (400 MHz, CDCl<sub>3</sub>)  $\delta$  = 8.25 (brs, 1H), 7.63 (d,  $J$  = 8.0 Hz, 1H), 7.49 (dd,  $J$  = 13.6, 8.4 Hz, 4H), 7.44 (d,  $J$  = 8.0 Hz, 1H), 7.30-7.26 (m, 5H), 7.20-7.15 (m, 1H). Our data was in full agreement with previous reported in the literature.<sup>5</sup>

### 2,3-bis(4-iodophenyl)-1H-indole (3l)

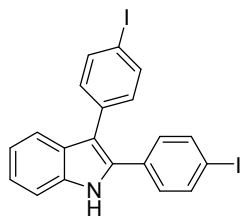

Following the general procedure B, **3l** was purified by silica gel chromatography (v/v, PE/EtOAc = 300:1) as a pale yellow solid (102 mg, 42 %). <sup>1</sup>H NMR (400 MHz, CDCl<sub>3</sub>)  $\delta$  = 8.26 (brs, 1H), 7.73-7.65 (m, 4H), 7.63 (d,  $J$  = 8.0 Hz, 1H), 7.43 (d,  $J$  = 8.0 Hz, 1H), 7.29-7.24 (m, 1H), 7.20-7.12 (m, 5H). <sup>13</sup>C NMR (100 MHz, CDCl<sub>3</sub>)  $\delta$  = 137.8, 137.7, 135.9, 134.3, 133.1, 131.8, 131.7, 129.7, 128.1, 123.2, 120.7, 119.4, 114.2, 111.1, 93.6, 91.8, 65.8. HRMS (ESI):



m/z [M+H]<sup>+</sup> calcd. for C<sub>20</sub>H<sub>14</sub>I<sub>2</sub>N<sup>+</sup>: 521.9216; Found: 521.9202.

### 2,3-di(naphthalen-1-yl)-1H-indole (3m)

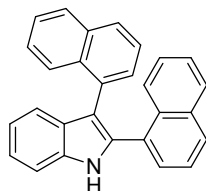

Following the general procedure B, **3m** was purified by silica gel chromatography (v/v, PE/EtOAc = 300:1) as a pale yellow solid (55 mg, 32%). <sup>1</sup>H NMR (400 MHz, CDCl<sub>3</sub>) δ = 8.44 (brs, 1H), 8.06 (d, *J* = 8.4 Hz, 1H), 8.00 (d, *J* = 8.4 Hz, 1H), 7.84 (dd, *J* = 8.0, 5.6 Hz, 2H), 7.76 (d, *J* = 8.4 Hz, 1H), 7.72 (dd, *J* = 7.2, 1.6 Hz, 1H), 7.52 (d, *J* = 8.0 Hz, 1H), 7.47-7.41 (m, 2H), 7.39-7.28 (m, 7H), 7.27-7.24 (m, 1H), 7.15 (t, *J* = 7.6 Hz, 1H). Our data was in full agreement with previous reported in the literature.<sup>2</sup>

### 2,3-di(thiophen-2-yl)-1H-indole (3n)

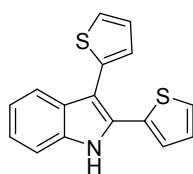

Following the general procedure B, **3n** was purified by silica gel chromatography (v/v, PE/EtOAc = 200:1) as a pale yellow solid (85 mg, 65%). <sup>1</sup>H NMR (400 MHz, CDCl<sub>3</sub>) δ = 8.27 (brs, 1H), 7.68 (d, *J* = 8.0 Hz, 1H), 7.42-7.38 (m, 2H), 7.31 (dd, *J* = 5.2, 1.2 Hz, 1H), 7.29-7.24 (m, 1H), 7.23-7.19 (m, 2H), 7.19-7.15 (m, 2H), 7.05 (dd, *J* = 4.8, 3.6 Hz, 1H). Our data was in full agreement with previous reported in the literature.<sup>6</sup>

### 5-methyl-2,3-diphenyl-1H-indole (3o)

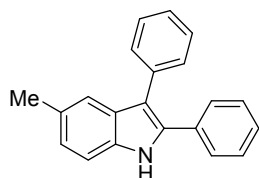

Following the general procedure B, **3o** was purified by silica gel chromatography (v/v, PE/EtOAc = 200:1) as a pale yellow solid (105 mg, 84%). <sup>1</sup>H NMR (400 MHz, CDCl<sub>3</sub>) δ = 8.14 (brs, 1H), 7.48-7.38 (m, 7H), 7.35-7.28 (m, 5H), 7.09 (d, *J* = 8.0 Hz, 1H), 2.46 (s, 3H). Our data was in full agreement with previous reported in the literature.<sup>3</sup>

### 5-fluoro-2,3-diphenyl-1H-indole (3p)

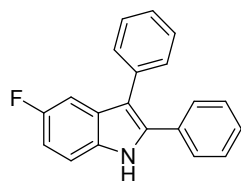

Following the general procedure B, **3p** was purified by silica gel chromatography (v/v, PE/EtOAc = 200:1) as a pale yellow solid (90 mg, 72%). <sup>1</sup>H NMR (400 MHz, CDCl<sub>3</sub>)  $\delta$  = 8.21 (brs, 1H), 7.44-7.38 (m, 6H), 7.37-7.30 (m, 6H), 7.00 (td,  $J$  = 9.2, 2.4 Hz, 1H). Our data was in full agreement with previous reported in the literature.<sup>3</sup>

### 2,3-diphenyl-5-(trifluoromethyl)-1H-indole (3q)

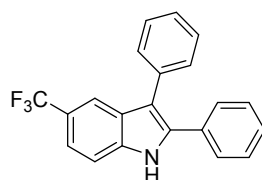

Following the general procedure B, **3q** was purified by silica gel chromatography (v/v, PE/EtOAc = 400:1) as a pale yellow solid (60 mg, 50%). <sup>1</sup>H NMR (400 MHz, CDCl<sub>3</sub>)  $\delta$  = 8.46 (brs, 1H), 7.94 (s, 1H), 7.53-7.46 (m, 2H), 7.45-7.40 (m, 6H), 7.38-7.32 (m, 4H). Our data was in full agreement with previous reported in the literature.<sup>7</sup>

### 2,3-diphenyl-1H-indole-5-carbonitrile (3r)

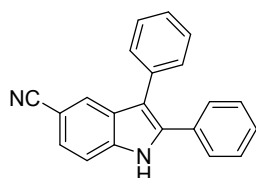

Following the general procedure B, **3r** was purified by silica gel chromatography (v/v, PE/EtOAc = 100:1) as a pale yellow solid (40 mg, 32%). <sup>1</sup>H NMR (400 MHz, CDCl<sub>3</sub>)  $\delta$  = 8.47 (brs, 1H), 7.94 (s, 1H), 7.53-7.46 (m, 2H), 7.45-7.40 (m, 6H), 7.38-7.31 (m, 4H). Our data was in full agreement with previous reported in the literature.<sup>3</sup>

### The synthesis of internal alkyne 4a

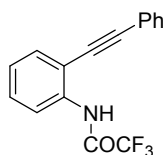

A nitrogen-filled round-bottom flask was charged with **1a** (0.47 mmol), Pd(PPh<sub>3</sub>)<sub>4</sub> (54 mg,

0.047 mmol) and anhydrous DMF (3 mL), and then Et<sub>3</sub>N (238 mg, 0.33 mL, 2.35 mmol) and PhI (479 mg, 0.26 mL, 2.35 mmol) were added in order. After the solution was stirred at 70 °C for 0.5 h, the reaction was quenched with water (3 mL) and the aqueous layer was extracted with DCM (10 mL × 3). The combined organic layer was dried over MgSO<sub>4</sub>, the volatile was removed under vacuum, and then the resulting residue was purified by silica gel column chromatography (PE/EtOAc) to afford pure product **4a** as pale yellow solid (117 mg, 86%). <sup>1</sup>H NMR (400 MHz, CDCl<sub>3</sub>) δ = 8.90 (brs, 1H), 8.38 (d, *J* = 8.0 Hz, 1H), 7.59-7.52 (m, 3H), 7.45-7.40 (m, 4H), 7.23 (t, *J* = 7.6 Hz, 1H). Our data are in full agreement with previous reported in the literature.<sup>8</sup>

#### The cyclization of **4a** with PhI under the catalysis of Pd(PPh<sub>3</sub>)<sub>4</sub>

A nitrogen-filled round-bottom flask was charged with **4a** (136 mg, 0.47 mmol), Pd(PPh<sub>3</sub>)<sub>4</sub> (54 mg, 0.047 mmol) and anhydrous DMF (3 mL), and then Et<sub>3</sub>N (238 mg, 0.33 mL, 2.35 mmol) and PhI (479 mg, 0.26 mL, 2.35 mmol) were added in order. After the solution was stirred at 70 °C for 24 h, the reaction was quenched with water (3 mL) and the aqueous layer was extracted with DCM (10 mL × 3). The combined organic layer was dried over MgSO<sub>4</sub>, the volatile was removed under vacuum, and then the resulting residue was purified by silica gel column chromatography (PE/EtOAc) to afford pure product **3a** as pale yellow solid (109 mg, 86%).

#### General procedure C for the synthesis of 2,3-diaryl indoles **5a-5i**:

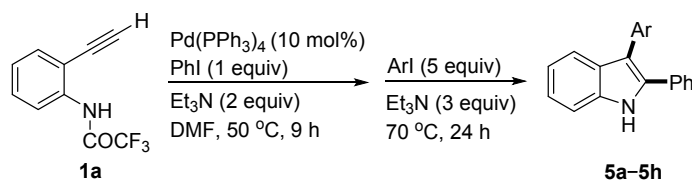

A nitrogen-filled round-bottom flask was charged with **1a** (100 mg, 0.47 mmol), Pd(PPh<sub>3</sub>)<sub>4</sub> (54 mg, 0.047 mmol) and anhydrous DMF (3 mL), and then Et<sub>3</sub>N (95 mg, 0.13 mL, 0.94 mmol) and PhI (96 mg, 52 μL, 0.47 mmol) were added in order. After the solution was stirred at 50 °C for 9 h, another portion of Et<sub>3</sub>N (143 mg, 0.2 mL, 1.41 mmol) and second aryl iodide (2.35 mmol) were added to the reaction mixture. After the solution was stirred at 70 °C for another 24 h, the reaction was quenched with water, and the aqueous layer was extracted with DCM. The combined organic layer was dried over MgSO<sub>4</sub>, the volatile was removed under vacuum, and then the crude product was purified by silica gel column chromatography (PE/EtOAc) to afford pure products **5a-5h**.

### General procedure D for the synthesis of 2,3-diaryl indoles 5i-5k:

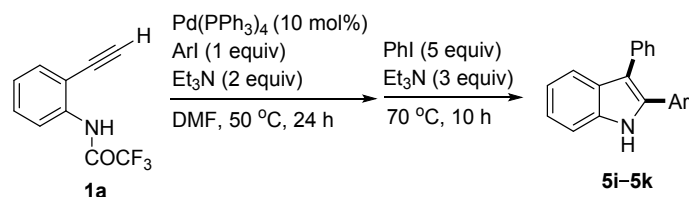

A nitrogen-filled round-bottom flask was charged with **1a** (100 mg, 0.47 mmol), Pd(PPh<sub>3</sub>)<sub>4</sub> (54 mg, 0.047 mmol) and anhydrous DMF (3 mL), and then Et<sub>3</sub>N (95 mg, 0.13 mL, 0.94 mmol) and aryl iodide (0.94 mmol) were added in order. After the solution was stirred at 50 °C for 24 h, another portion of Et<sub>3</sub>N (143 mg, 0.2 mL, 1.41 mmol) and PhI (479 mg, 0.26 mL, 0.47 mmol) were added to the reaction mixture. After the solution was stirred at 70 °C for another 10 h, the reaction was quenched with water, and the aqueous layer was extracted with DCM. The combined organic layer was dried over MgSO<sub>4</sub>, the volatile was removed under vacuum, and then the crude product was purified by silica gel column chromatography (PE/EtOAc) to afford pure products **5i-5k**.

### 3-(3-methoxyphenyl)-2-phenyl-1H-indole (**5a**)

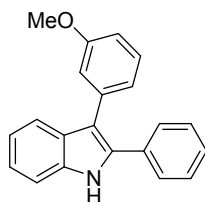

Following the general procedure C, **5a** was purified by silica gel chromatography (v/v, PE/EtOAc = 200:1) as a pale yellow solid (120 mg, 86%). <sup>1</sup>H NMR (400 MHz, CDCl<sub>3</sub>)  $\delta$  = 8.26 (brs, 1H), 7.72 (d, *J* = 8.0 Hz, 1H), 7.47-7.42 (m, 3H), 7.37-7.24 (m, 5H), 7.19-7.15 (m, 1H), 7.05-7.01 (m, 2H), 6.86 (ddd, *J* = 8.0, 3.2, 0.8 Hz, 1H), 3.75 (s, 3H). Our data was in full agreement with previous reported in the literature.<sup>9</sup>

### 3-(4-methoxyphenyl)-2-phenyl-1H-indole (**5b**)

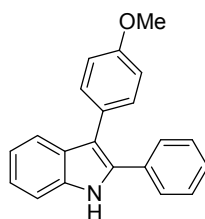

Following the general procedure C, **5b** was purified by silica gel chromatography (v/v, PE/EtOAc = 400:1) as a pale yellow solid (70 mg, 50%). <sup>1</sup>H NMR (400 MHz, CDCl<sub>3</sub>)  $\delta$  = 8.31 (brs, 1H), 7.48 (d, *J* = 7.6 Hz, 1H), 7.44-7.39 (m, 3H), 7.36-7.28 (m, 4H), 7.27-7.20 (m, 2H),

7.14-7.10 (m, 1H), 7.02-6.96 (m, 2H), 3.55 (s, 3H). Our data was in full agreement with previous reported in the literature.<sup>9</sup>

#### 4-(2-phenyl-1H-indol-3-yl)benzonitrile (**5c**)

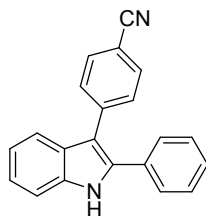

Following the general procedure C, **5c** was purified by silica gel chromatography (v/v, PE/EtOAc = 200:1) as a pale yellow solid (114 mg, 83%). <sup>1</sup>H NMR (400 MHz, CDCl<sub>3</sub>)  $\delta$  = 8.36 (brs, 1H), 7.68 (d,  $J$  = 8.0 Hz, 1H), 7.64 (d,  $J$  = 8.4 Hz, 2H), 7.54 (d,  $J$  = 8.4 Hz, 2H), 7.47 (d,  $J$  = 8.0 Hz, 1H), 7.41-35 (m, 5H), 7.31-7.27 (m, 1H), 7.23-7.18 (m, 1H). Our data was in full agreement with previous reported in the literature.<sup>9</sup>

#### 3-(naphthalen-1-yl)-2-phenyl-1H-indole (**5d**)

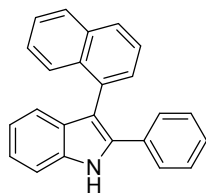

Following the general procedure C, **5d** was purified by silica gel chromatography (v/v, PE/EtOAc = 200:1) as a pale yellow solid (108 mg, 73%). <sup>1</sup>H NMR (400 MHz, CDCl<sub>3</sub>)  $\delta$  = 8.44 (brs, 1H), 7.92 (dd,  $J$  = 16.4, 8.0 Hz, 2H), 7.80 (d,  $J$  = 8.4 Hz, 1H), 7.52-7.44 (m, 4H), 7.34-7.28 (m, 3H), 7.27-7.26 (m, 1H), 7.23-7.17 (m, 4H), 7.09- 7.05 (m, 1H). Our data was in full agreement with previous reported in the literature.<sup>10</sup>

#### 2-phenyl-3-(thiophen-2-yl)-1H-indole (**5e**)

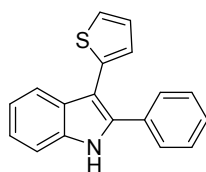

Following the general procedure C, **5e** was purified by silica gel chromatography (v/v, PE/EtOAc = 200:1) as a pale yellow solid (100 mg, 78%). <sup>1</sup>H NMR (400 MHz, CDCl<sub>3</sub>)  $\delta$  = 8.28 (brs, 1H), 7.80 (d,  $J$  = 8.0 Hz, 1H), 7.52 (dd,  $J$  = 8.4, 1.6 Hz, 2H), 7.44-7.36 (m, 4H), 7.31-7.28 (m, 1H), 7.27-7.24 (m, 1H), 7.22-7.18 (m, 1H), 7.10-7.05 (m, 2H). Our data was in full agreement with previous reported in the literature.<sup>10</sup>

### 3-(4-fluorophenyl)-2-phenyl-1H-indole (5f)

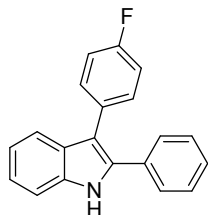

Following the general procedure C, the crude product was purified by silica gel chromatography (v/v, PE/EtOAc = 300:1) to afford a mixture of **5f** and **3a** in the ratio of 5 : 2 (118 mg, 89%). Our data was in full agreement with previous reported in the literature.<sup>10</sup>

### 3-(4-chlorophenyl)-2-phenyl-1H-indole (5g)

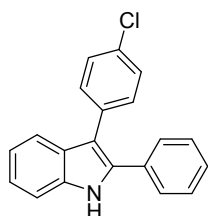

Following the general procedure C, the crude product was purified by silica gel chromatography (v/v, PE/EtOAc = 300:1) to afford a mixture of **5g** and **3a** in the ratio of 3 : 1 (122 mg, 88%). Our data was in full agreement with previous reported in the literature.<sup>10</sup>

### 3-(4-bromophenyl)-2-phenyl-1H-indole (5h)

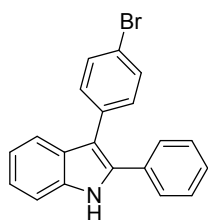

Following the general procedure C, the crude product was purified by silica gel chromatography (v/v, PE/EtOAc = 300:1) to afford a mixture of **5h** and **3a** in the ratio of 3 : 1 (125 mg, 81%). Our data was in full agreement with previous reported in the literature.<sup>5</sup>

### 2-(2-methoxyphenyl)-3-phenyl-1H-indole (5i)

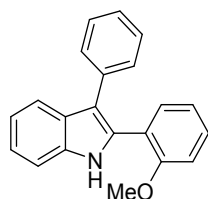

Following the general procedure D, **5i** was purified by silica gel chromatography (v/v, PE/EtOAc = 100:1) as a pale yellow solid (55 mg, 40%). <sup>1</sup>H NMR (400 MHz, CDCl<sub>3</sub>) δ = 9.02 (brs, 1H), 7.72 (d, *J* = 8.0 Hz, 1H), 7.45 (dd, *J* = 7.2, 5.6 Hz, 3H), 7.38 (t, *J* = 7.6 Hz, 2H), 7.31-7.22 (m, 4H), 7.14 (t, *J* = 8.0 Hz, 1H), 7.01 (d, *J* = 8.0 Hz, 1H), 6.82 (t, *J* = 7.6 Hz, 1H), 3.87 (s, 3H). <sup>13</sup>C NMR (100 MHz, CDCl<sub>3</sub>) δ = 156.7, 135.8, 135.4, 132.0, 131.1, 130.1, 129.0, 128.4, 127.8, 125.9, 122.4, 120.9, 120.8, 119.9, 119.4, 115.7, 111.6, 110.7, 55.7, 55.6, 26.9. HRMS (ESI): *m/z* [M+H]<sup>+</sup> calcd. for C<sub>21</sub>H<sub>18</sub>NO<sup>+</sup>: 300.1388; found: 300.1383.

### 3-phenyl-2-(4-(trifluoromethyl)phenyl)-1H-indole (**5j**)

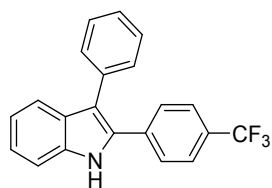

Following the general procedure D, **5j** was purified by silica gel chromatography (v/v, PE/EtOAc = 100:1) as a pale yellow solid (64 mg, 41%). <sup>1</sup>H NMR (400 MHz, CDCl<sub>3</sub>) δ = 8.29 (s, 1H), 7.68 (d, *J* = 8.0 Hz, 1H), 7.55 (dd, *J* = 18.4, 8.8 Hz, 4H), 7.46 (d, *J* = 8.0 Hz, 1H), 7.44-7.39 (m, 4H), 7.36-7.32 (m, 1H), 7.31-7.27 (m, 1H), 7.20-7.16 (m, 1H). <sup>13</sup>C NMR (100 MHz, CDCl<sub>3</sub>) δ = 136.1, 134.4, 132.2, 130.1, 129.4, 129.1, 128.7, 128.7, 128.1, 126.7, 125.5 (q, *J* = 11.2 Hz), 125.4, 123.4, 122.7, 120.7, 220.0, 116.6, 111.1, 29.7. <sup>19</sup>F NMR (376 MHz, CDCl<sub>3</sub>) δ = -62.5. HRMS (ESI): *m/z* [M+H]<sup>+</sup> calcd. for 338.1157; found: 338.1105.

### 2-(naphthalen-1-yl)-3-phenyl-1H-indole (**5k**)

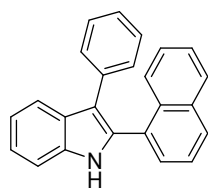

Following the general procedure D, **5k** was purified by silica gel chromatography (v/v, PE/EtOAc = 100:1) as a pale yellow solid (57 mg, 38%). <sup>1</sup>H NMR (400 MHz, CDCl<sub>3</sub>) δ = 8.28 (s, 1H), 7.93-7.87 (m, 4H), 7.51-7.43 (m, 4H), 7.40-7.29 (m, 4H), 7.25-7.18 (m, 3H), 7.15-7.11 (m, 1H). <sup>13</sup>C NMR (100 MHz, CDCl<sub>3</sub>) δ = 135.8, 134.9, 133.6, 133.2, 132.2, 130.5, 129.2, 128.8, 128.2, 128.2, 127.5, 126.5, 126.0, 125.9, 125.7, 125.3, 122.5, 120.4, 119.7, 116.6, 110.9. HRMS (ESI): *m/z* [M+H]<sup>+</sup> calcd. for C<sub>24</sub>H<sub>18</sub>N<sup>+</sup>: 320.1439; found: 320.1438.

### The synthesis of *N*-allyl-*N*-(2-ethynylphenyl)-2,2,2-trifluoroacetamide **6**:

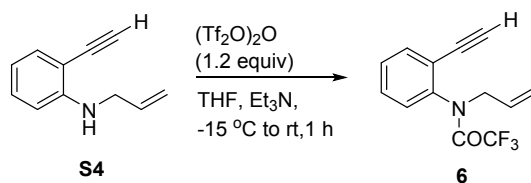

In a round-bottom flask, Et<sub>3</sub>N (1 mL) was added to a solution of **S4** (0.5 g, 3.18 mmol) in THF (10 mL) at -15°C, followed by dropwise addition of trifluoroacetic anhydride (0.54 mL, 1.2 equiv). The reaction mixture was stirred at room temperature for 1h. Then the solution was quenched with water (10 mL) and the aqueous layer was extracted with EtOAc (10 mL × 3). The combined organic layer was dried over MgSO<sub>4</sub>, and then the filtrate was concentrated to afford pure **6** as brown oil (773 mg, 96%). <sup>1</sup>H NMR (400 MHz, CDCl<sub>3</sub>) δ = 7.60-7.57 (m, 1H), 7.40-7.36 (m, 2H), 7.18-7.15 (m, 1H), 5.90-5.80 (m, 1H), 5.19-5.09 (m, 2H), 4.87 (dd, *J* = 14.4, 5.6 Hz, 1H), 3.86 (dd, *J* = 14.4, 7.6 Hz, 1H), 3.31 (s, 1H). <sup>13</sup>C NMR (100 MHz, CDCl<sub>3</sub>) δ = 156.6 (q, *J* = 36.3 Hz), 140.3, 134.4, 132.8, 131.4 (dd, *J* = 8.0, 5.0 Hz), 130.6, 129.8, 129.0, 128.3, 122.1, 121.6 (t, *J* = 5.8 Hz), 120.0 (dd, *J* = 10.0, 5.7 Hz), 118.5 (t, *J* = 5.8 Hz), 117.5, 114.7, 84.5, 82.0, 53.3. <sup>19</sup>F NMR (376 MHz, CDCl<sub>3</sub>) δ = -68.5. HRMS (EI): *m/z* M<sup>+</sup> calcd. for C<sub>13</sub>H<sub>10</sub>F<sub>3</sub>NO<sup>+</sup>: 253.0709; Found: 253.0692.

### The domino Sonogashira coupling/cyclization to *N*-allyl *o*-ethynylaniline **6**:

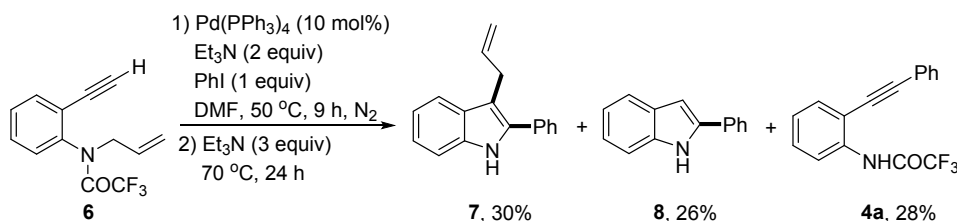

A nitrogen-filled round-bottom flask was charged with **6** (100 mg, 0.40 mmol), Pd(PPh<sub>3</sub>)<sub>4</sub> (54 mg, 0.04 mmol) and anhydrous DMF (3 mL), and then Et<sub>3</sub>N (0.11 mL, 0.80 mmol), PhI (0.044 mL, 0.40 mmol) were added in order. After the solution was stirred at 50 °C for 9 h, another portion of Et<sub>3</sub>N (0.165 mL, 1.20 mmol) was added to the reaction mixture. After the solution was stirred at 70 °C for another 24 h, the reaction was quenched with water, and the aqueous layer was extracted with DCM. The combined organic layer was dried over MgSO<sub>4</sub>, the volatile was removed under vacuum, and then the crude product was purified by column chromatography using silica gel (v/v, PE/EtOAc = 300:1) to afford pure product **7** as a pale yellow solid (28 mg, 30%), along with the minor product **8** as a pale yellow solid (20 mg, 26%) and **4b** (32 mg, 28%). Product **7**: <sup>1</sup>H NMR (400 MHz, CDCl<sub>3</sub>) δ = 8.07 (brs, 1H), 7.62 (d, *J* = 8.0 Hz, 1H), 7.59-7.56 (m, 2H), 7.48 (t, *J* = 7.2 Hz, 2H), 7.41-7.36 (m, 2H), 7.25-7.20 (m, 1H), 7.17-7.13 (m, 1H), 6.20-6.10 (m, 1H), 5.13 (dd, *J* = 6.8, 2.0 Hz, 1H), 5.09 (t, *J* = 2.0 Hz, 1H), 3.65 (dt, *J* = 6.0, 1.6 Hz, 2H). Product **8**: <sup>1</sup>H NMR (400 MHz, CDCl<sub>3</sub>) δ = 8.35 (s, 1H), 7.68



(dd,  $J = 8.4, 1.2$  Hz, 2H), 7.65 (d,  $J = 8.4$  Hz, 1H), 7.46 (t,  $J = 7.6$  Hz, 2H), 7.41 (dd,  $J = 8.2, 0.6$  Hz, 1H), 7.34 (t,  $J = 7.6$  Hz, 1H), 7.23-7.18 (m, 1H), 7.16-7.11 (m, 1H), 6.84 (dd,  $J = 2.0, 0.4$  Hz, 1H). Our data of  $7^{11}$ ,  $8^{12}$  and  $4a^8$  were in full agreement with previous reported in the literatures.

#### Reference:

1. P. Cironi, J. Tulla-Puche, G. Barany, F. Albericio and M. Álvarez, *Org. Lett.*, 2004, **6**, 1405-1408.
2. Z. Zhou, G. X. Liu, Y. Chen and X. Y. Lu, *Adv. Synth. Catal.*, 2015, **357**, 2944-2950.
3. D. B. Zhao, Z. Z. Shi and F. Glorius, *Angew. Chem. Int. Ed.*, 2013, **52**, 12426-12429.
4. M. Thangaraj, S. S. Bhojgude, S. Jain, R. G. Gonnade and A. T. Biju, *J. Org. Chem.*, 2016, **81**, 8604-8611.
5. G. Y. Zhang, H. Yu, G. P. Qin and H. M. Huang, *Chem. Commun.*, 2014, **50**, 4331-4334.
6. A. Lerchen, S. Vásquez-Céspedes and F. Glorius, *Angew. Chem. Int. Ed.*, 2016, **55**, 3208-3211.
7. K. Muralirajan and C.-H. Cheng, *Adv. Synth. Catal.*, 2014, **356**, 1571-1576.
8. N. K. Swamy, A. Yazici and S. G. Pyne, *J. Org. Chem.* **2010**, *75*, 3412-3419.
9. S. Cacchi, G. Fabrizia, D. Lambab, F. Marinellie and L. M. Parisi, *Synthesis*, 2003, 728-734.
10. L. J. Gu, C. Jin, W. Wang, Y. H. He, G. Y. Yang and G. P. Li, *Chem. Commun.*, 2017, **53**, 4203-4206.
11. H. Lauwick, Y. Sun, H. Akdas-Kilig, S. Dérien and M. Achard, *Chem. Eur. J.*, 2018, **24**, 7964-7969
12. P. Rubio-Marqués, M. A. Rivero-Crespo, A. Leyva-Pérez and A. Corma, *J. Am. Chem. Soc.*, 2015, **137**, 11832-11837.

#### NMR Spectra

##### Compound 1a

PROTON CDCl3 {D:\data\research\new\2019-7-23} nmr 44

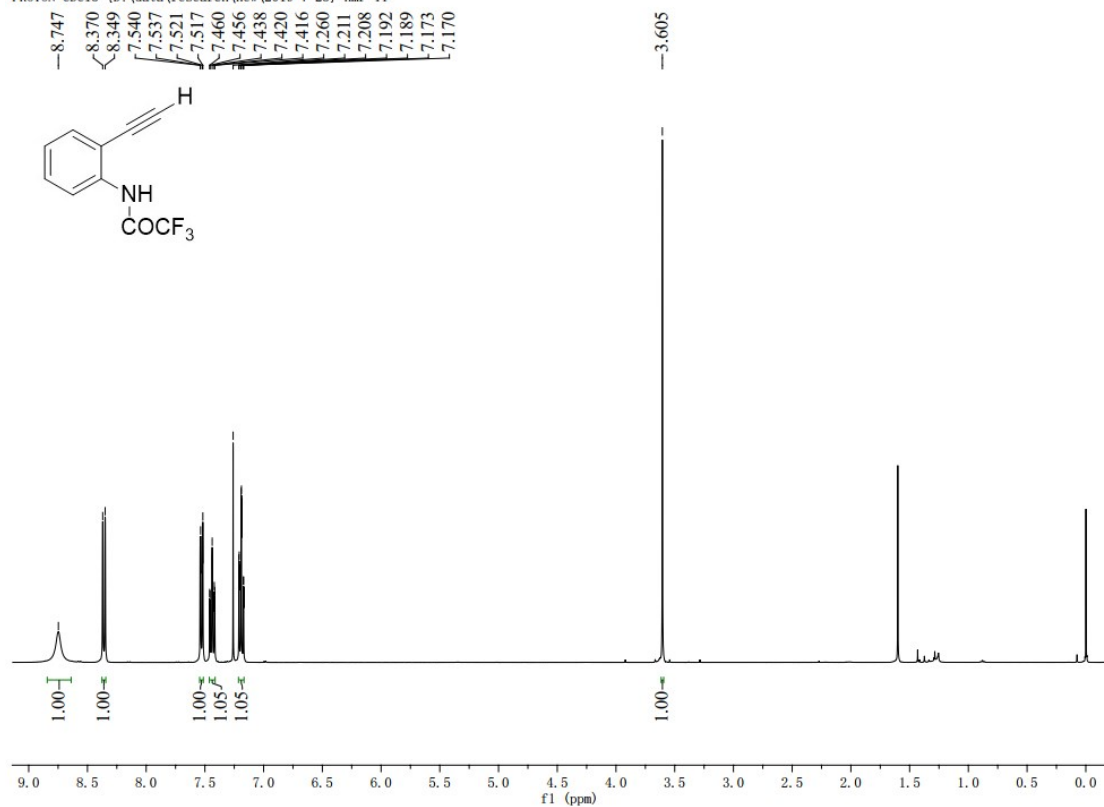

### Compound 1b

PROTON CDCl3 {D:\data\research\new\2020-1-6} nmr 2

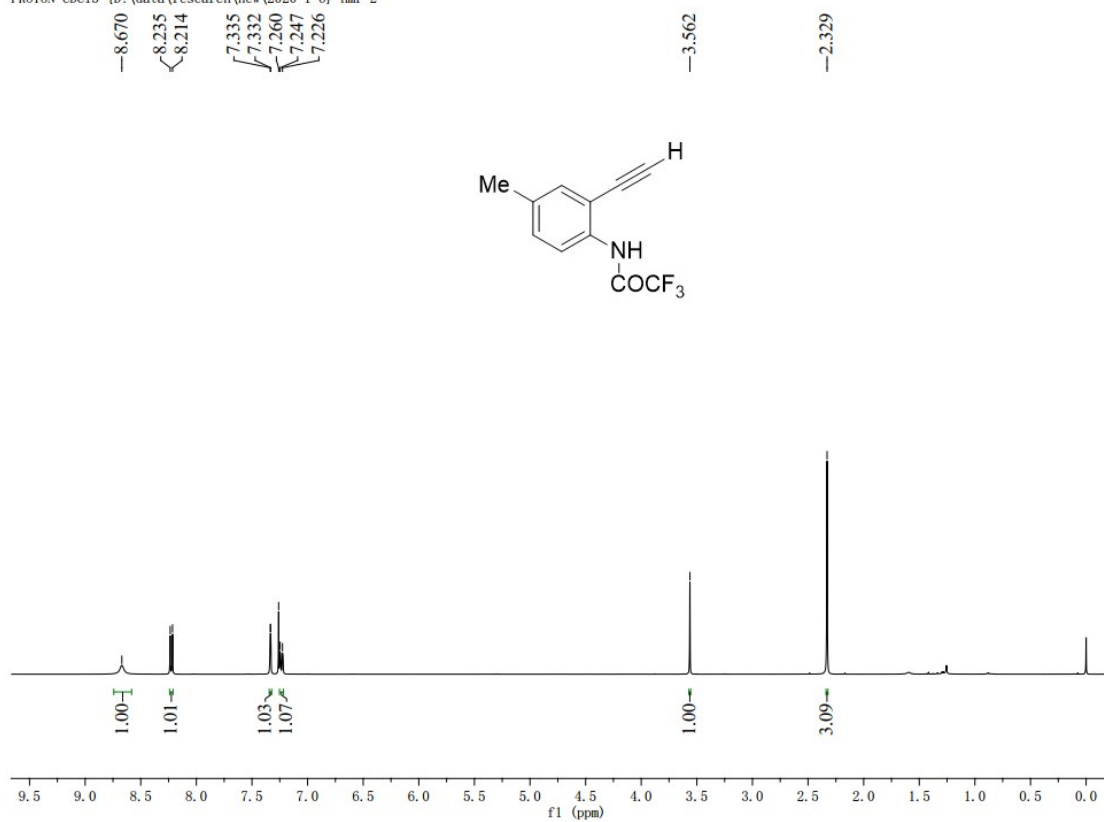

C13CPD CDC13 {D:\data\research\new\2020-1-13} nmr 43

154.894  
154.523  
154.151  
153.780

135.321  
134.332  
132.537  
130.995

119.540  
117.062  
114.193  
111.989

85.213  
85.185  
77.967  
77.318  
77.000  
76.682

20.587  
20.571

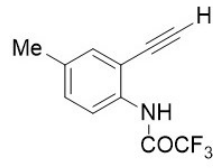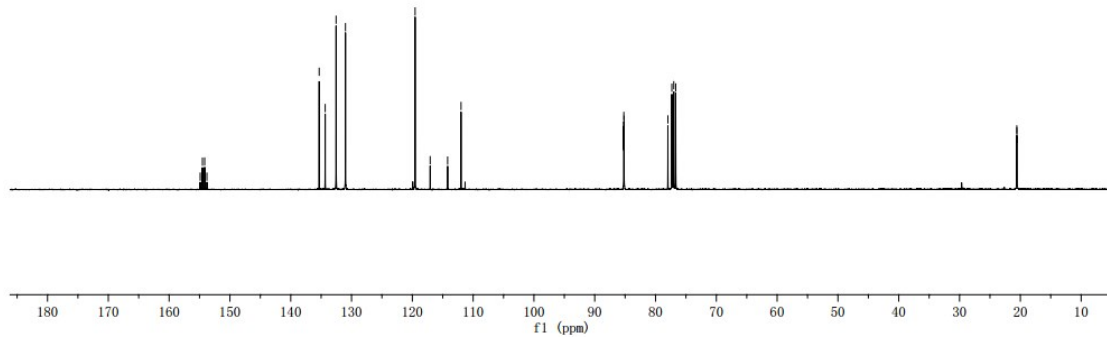

ju-wgd-005  
F19CPD CDC13 {D:\data\research\new\2020-11-4} nmr 41

75.890

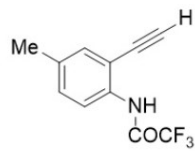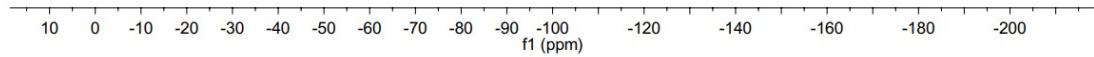

# Compound 1c

PROTON CDC13 {D:\data\research\new\20190-5-10} nmr 11

8.358  
8.346  
8.335  
8.323  
7.260  
7.242  
7.235  
7.221  
7.214  
7.158  
7.155

3.646

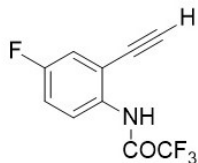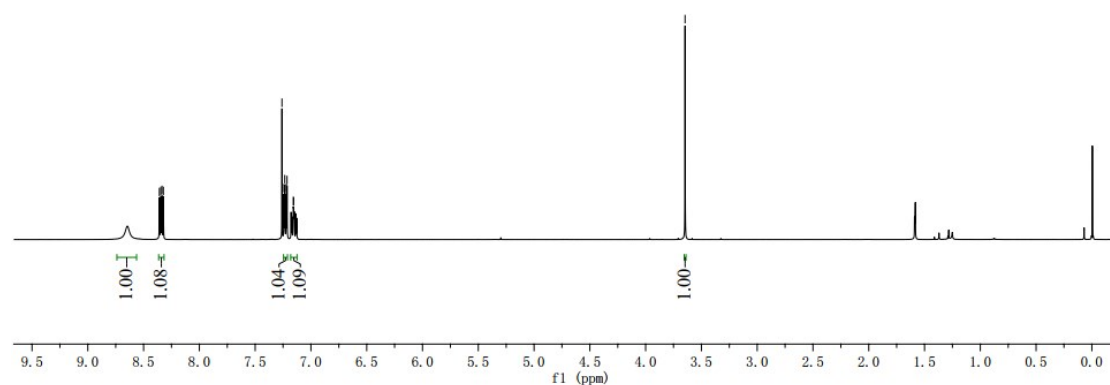

C13CPD CDC13 {D:\data\research\new\2020-1-13} nmr 44

160.357  
157.901  
155.079  
154.704  
154.329  
153.955  
133.160  
133.131  
121.609  
121.525  
119.052  
118.806  
117.674  
117.451  
117.003  
114.135  
113.957  
113.862  
86.587  
86.555  
77.318  
77.000  
76.682

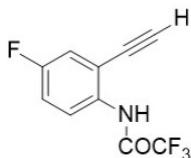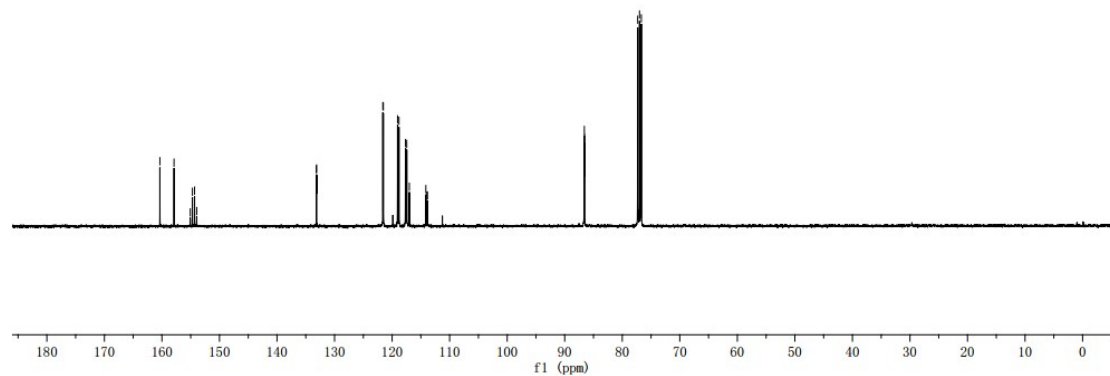

F19CPD CDC13 {D:\data\research\new\2019-5-13} nmr 9

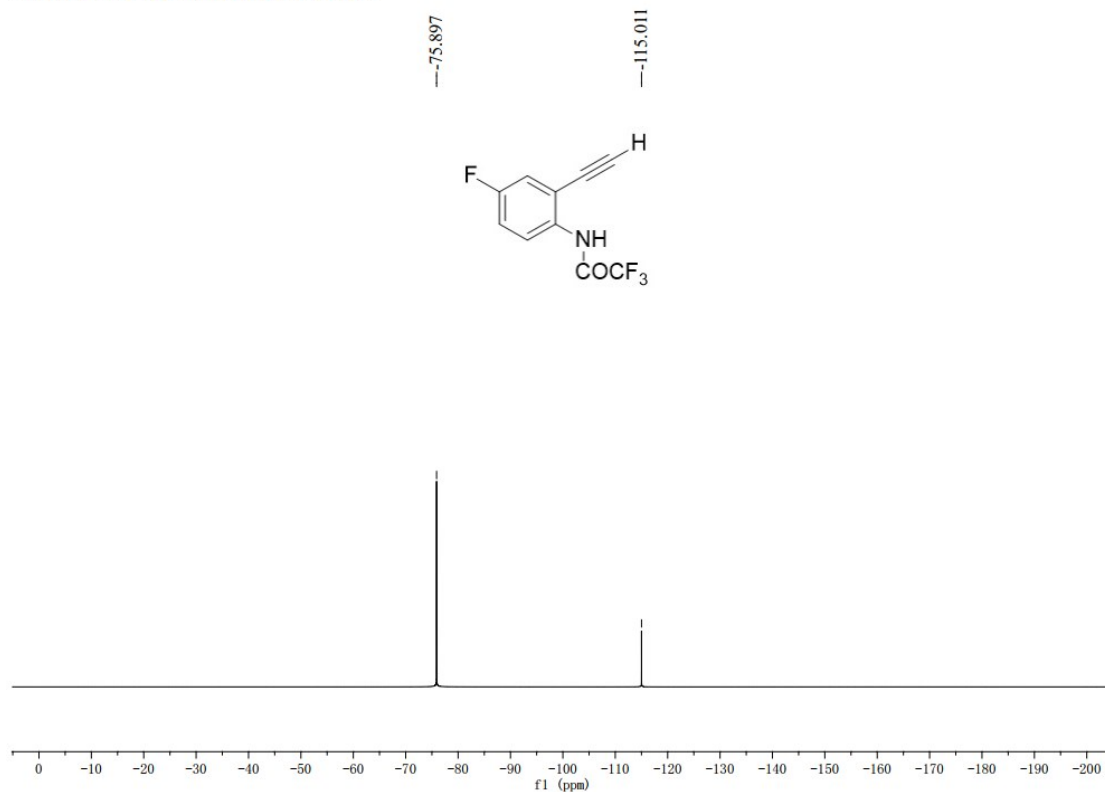

### Compound 1d

PROTON CDC13 {D:\data\research\new\2020-1-6} nmr 1

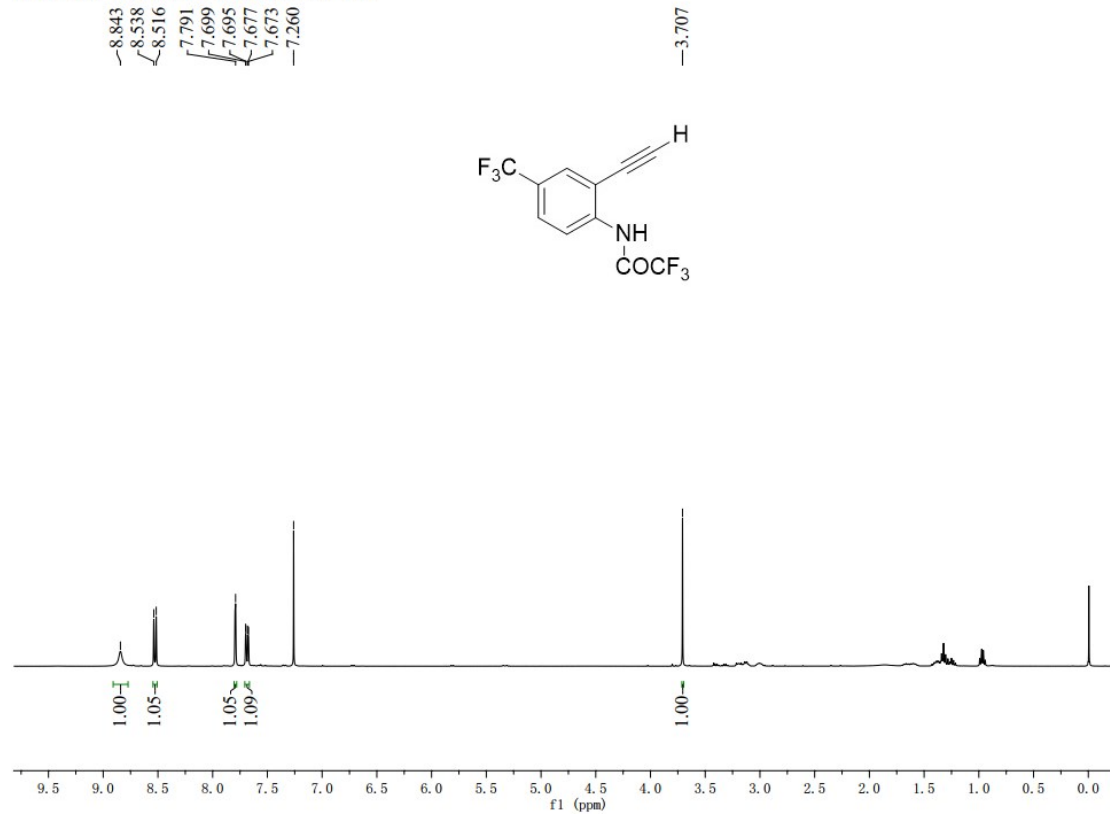

C13CPD CDC13 {D:\data\research\new\2020-1-13} nmr 42

155.427  
155.048  
154.669  
154.289  
139.469  
129.454  
129.416  
129.377  
127.789  
127.455  
127.351  
127.314  
127.278  
127.241  
124.511  
121.807  
119.715  
112.624  
87.246  
87.246  
77.318  
77.000  
76.682  
76.473

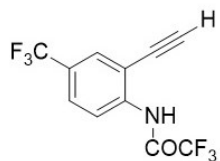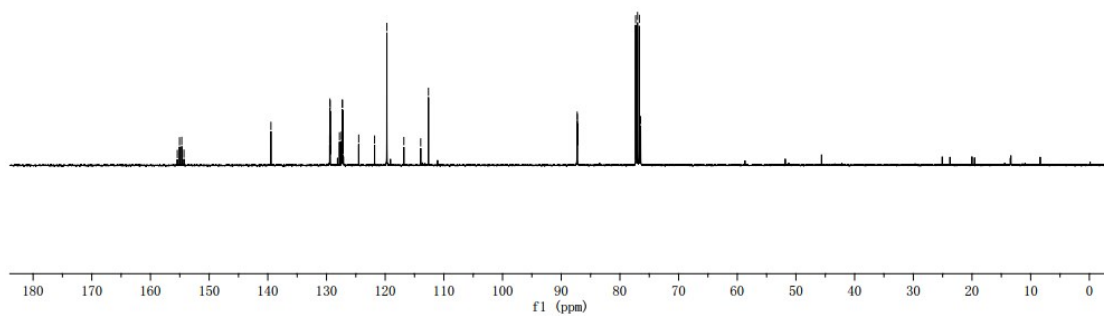

F19CPD CDC13 {D:\data\research\new\2020-1-14} nmr 17

62.728  
62.735  
75.874  
75.883

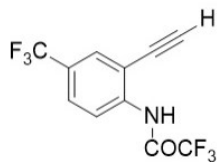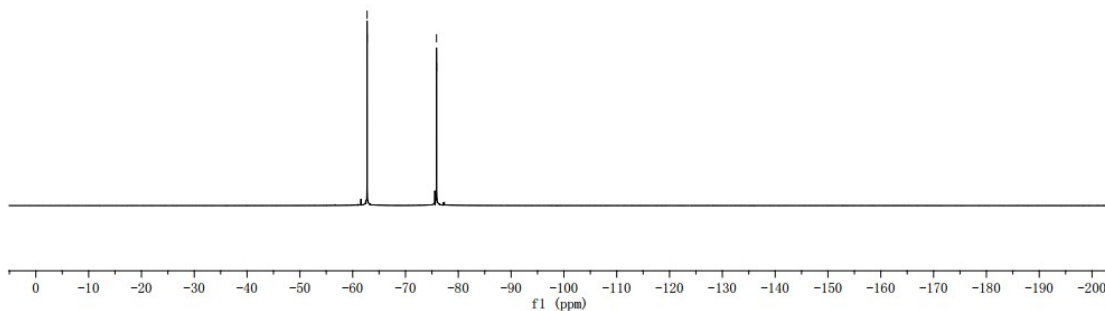

# Compound 1e

PROTON CDC13 {D:\data\research\new\2019-11-7} nmr 31

8.864  
8.564  
8.542

7.826  
7.821  
7.737  
7.733  
7.715  
7.710

3.749

1.574

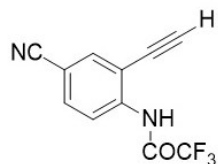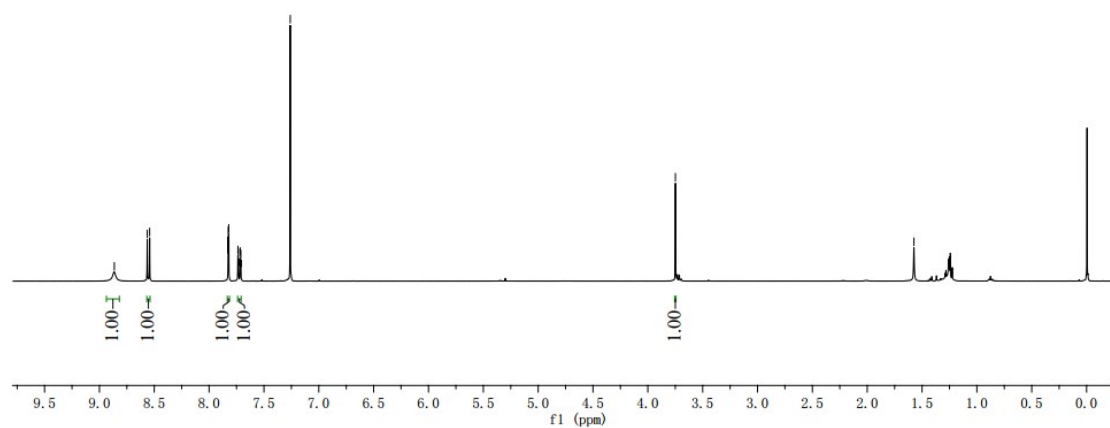

<sup>13</sup>CPD CDC13 {D:\data\research\new\2020-1-13} nmr 45

155.397  
155.016  
154.634  
154.252

140.132  
135.841  
133.972

119.945  
117.170  
113.099  
109.272

88.141  
88.103  
77.318  
77.000  
76.682  
75.685

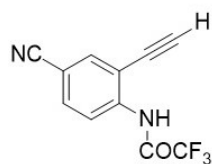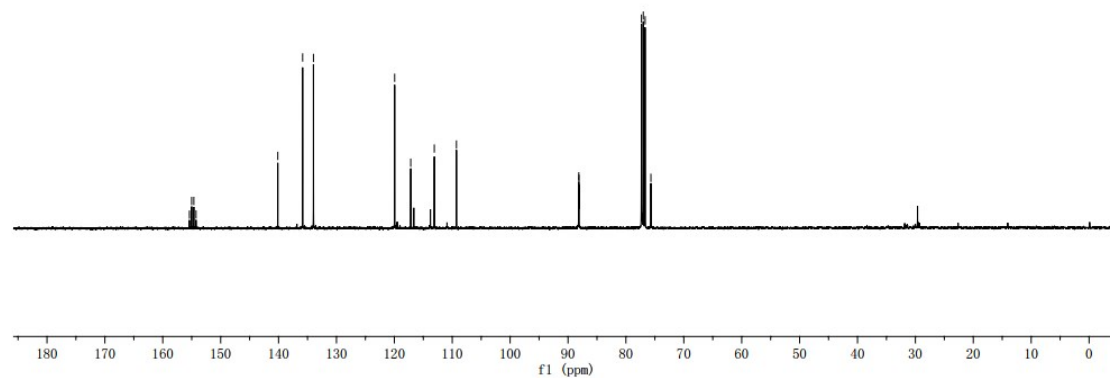

ju-wgd-002  
F19CPD CDC13 {D:\data\research\new\2020-11-1} nmr 40

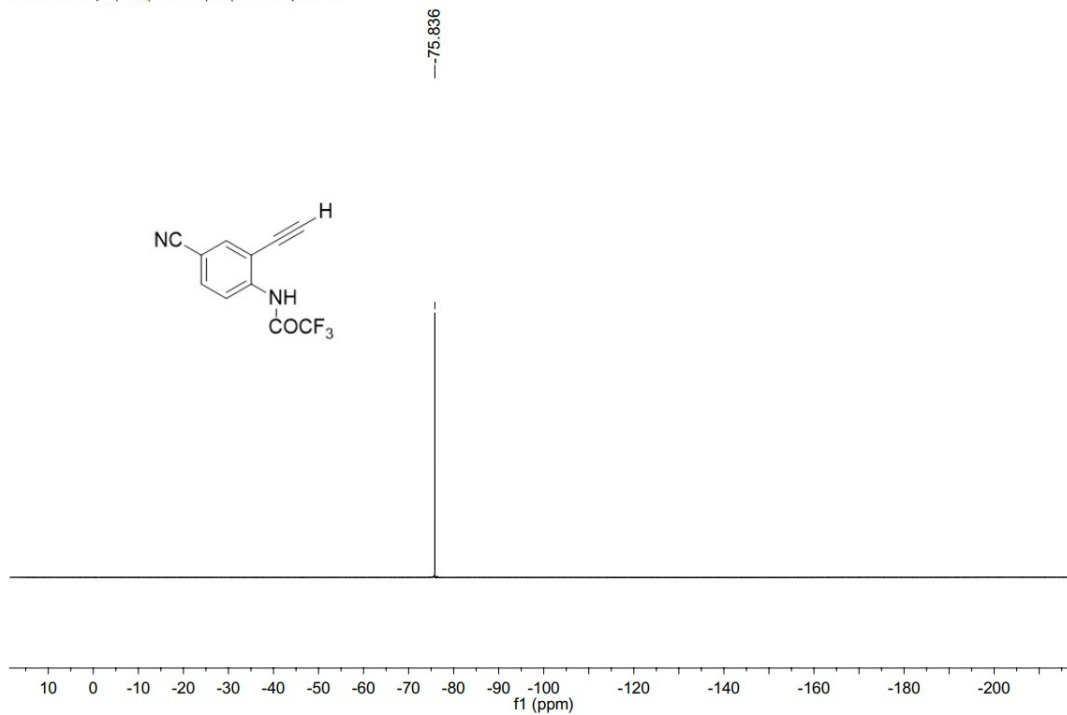

### Compound 3a

PROTON CDC13 {D:\data\research\new\2020-1-7} nmr 55

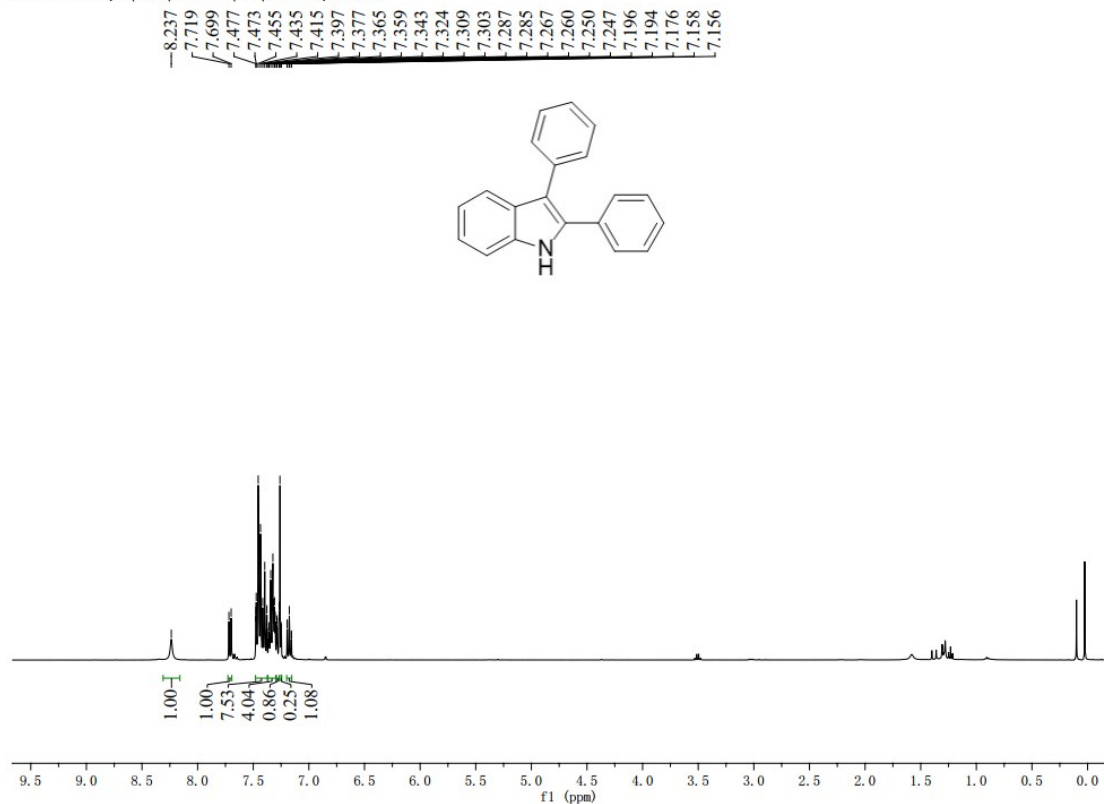



### Compound 3b

PROTON CDCl3 [D:\data\research\new\2020-1-14] nmr 13

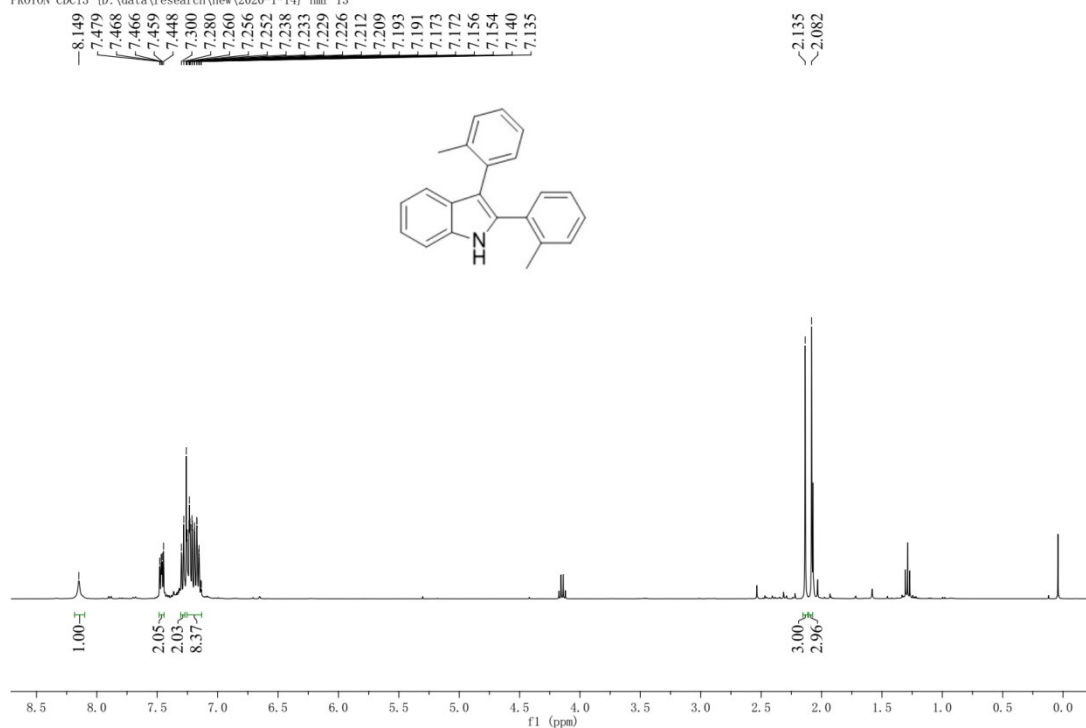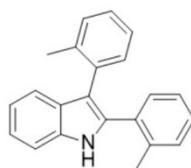

### Compound 3c

PROTON CDCl3 [D:\data\research\new\2019-9-16] nmr 4

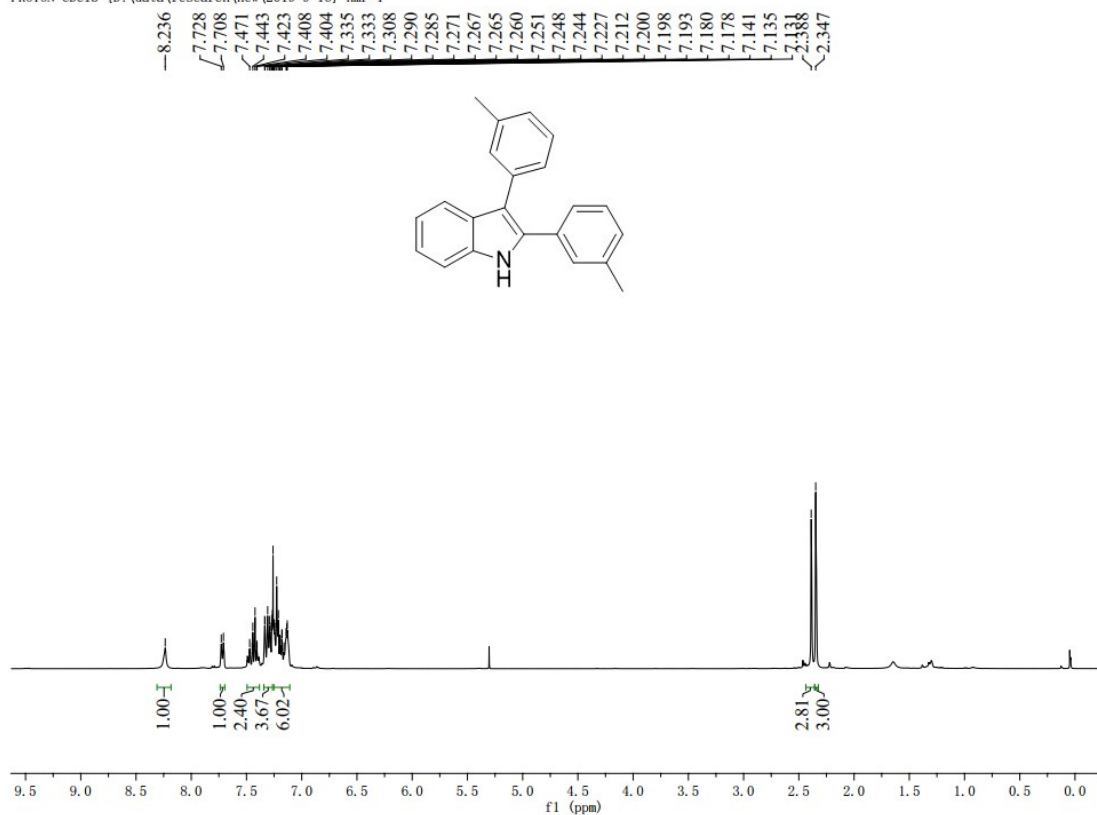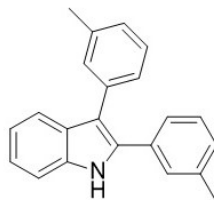

# Compound 3d

PROTON CDCl3 {D:\data\research\new\2020-1-9} nmr 47

9.193 7.507 7.487 7.444 7.423 7.367 7.363 7.349 7.344 7.322 7.317 7.260 7.248 7.242 7.231 7.218 7.213 7.117 7.097 7.010 6.994 6.992 6.987 6.982 6.962 6.785 6.886 3.566

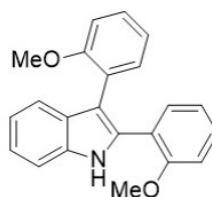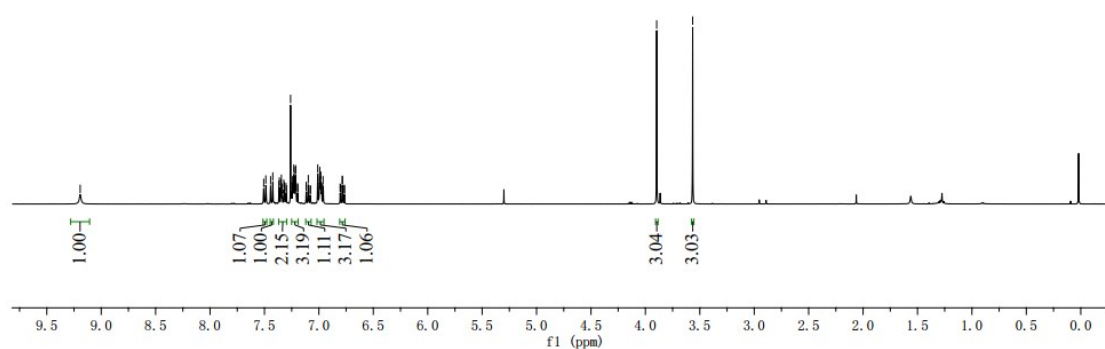

157.325 156.177 135.336 132.398 131.987 130.819 128.534 127.860 122.003 121.747 120.737 120.624 119.891 119.482 117.584 111.408 111.249 110.709 77.318 77.000 76.683 55.725 55.680 55.134 55.102

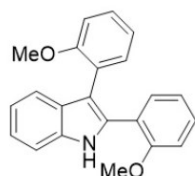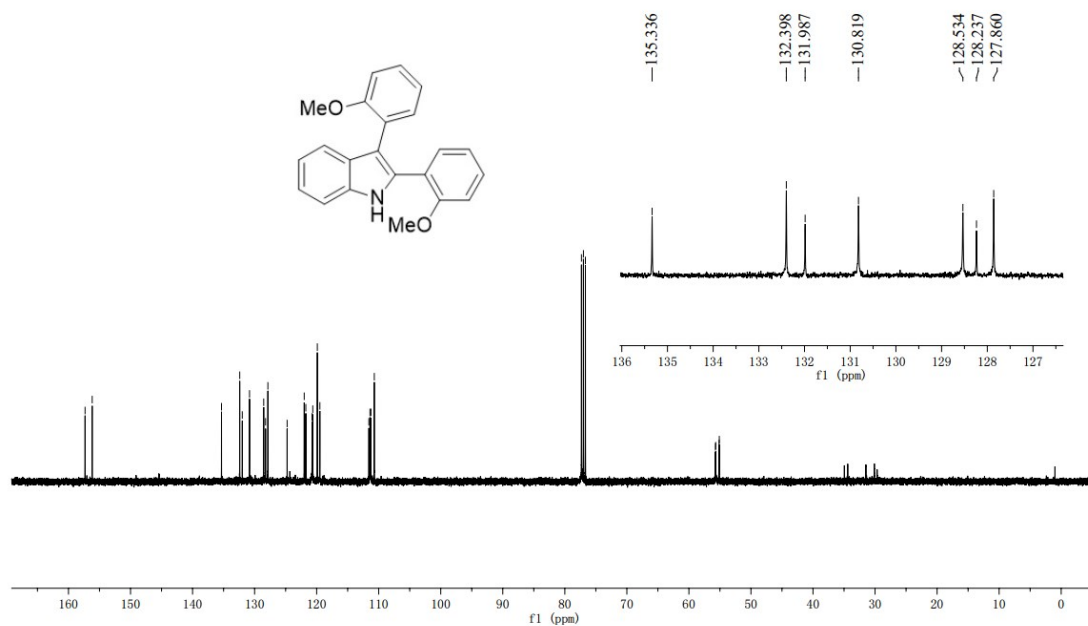

# Compound 3e

PROTON CDC13 {D:\data\research\new\2019-10-15} nmr 33

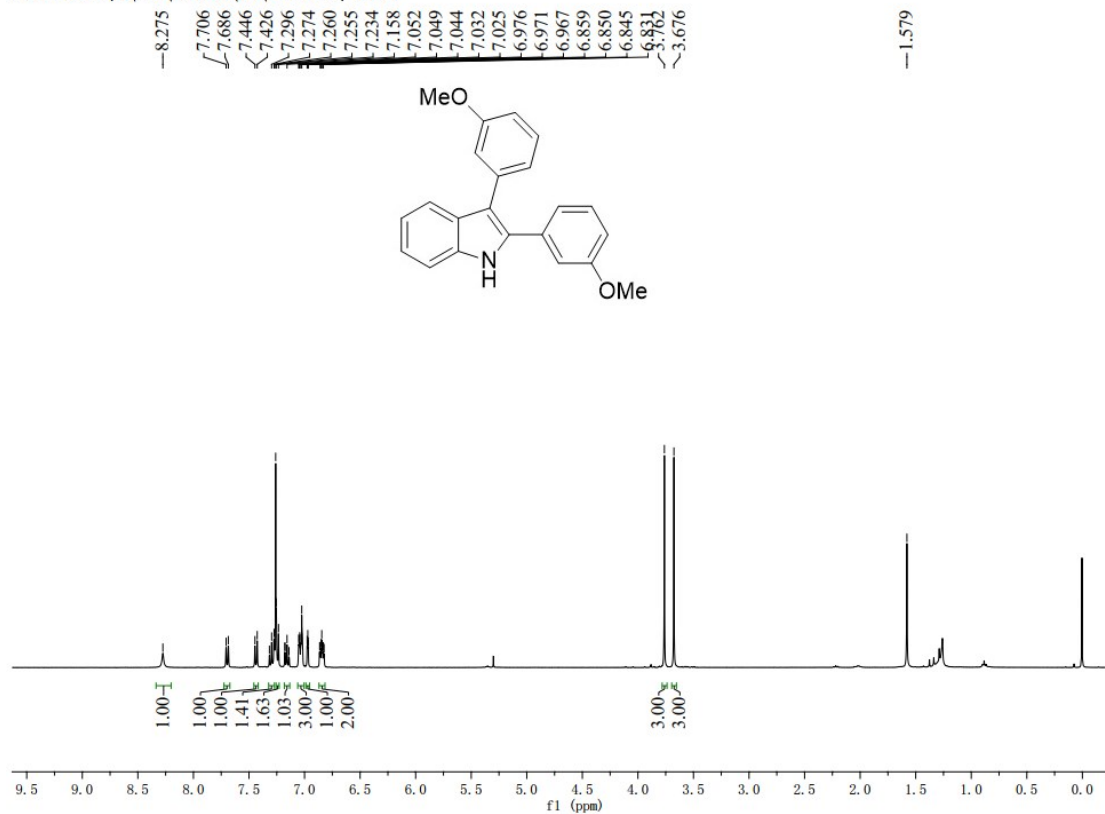

### Compound 3f

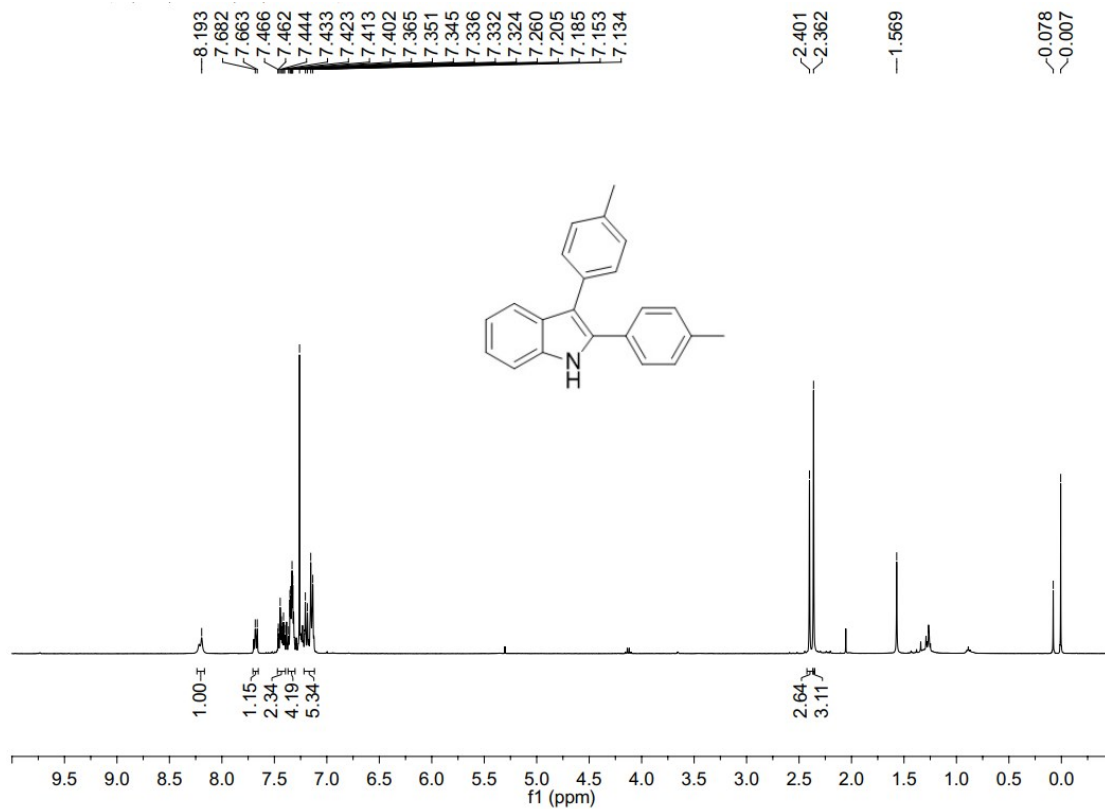

### Compound 3g

PROTON CDCl3 {D:\data\research\new\2019-6-19} nmr 38

8.178  
7.661  
7.641  
7.416  
7.396  
7.374  
7.357  
7.352  
7.260  
7.245  
7.228  
7.208  
7.164  
7.145  
7.127  
6.958  
6.883  
6.861  
3.861  
3.822

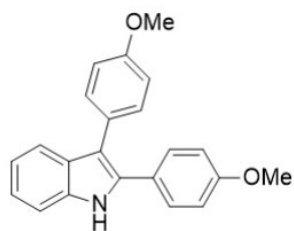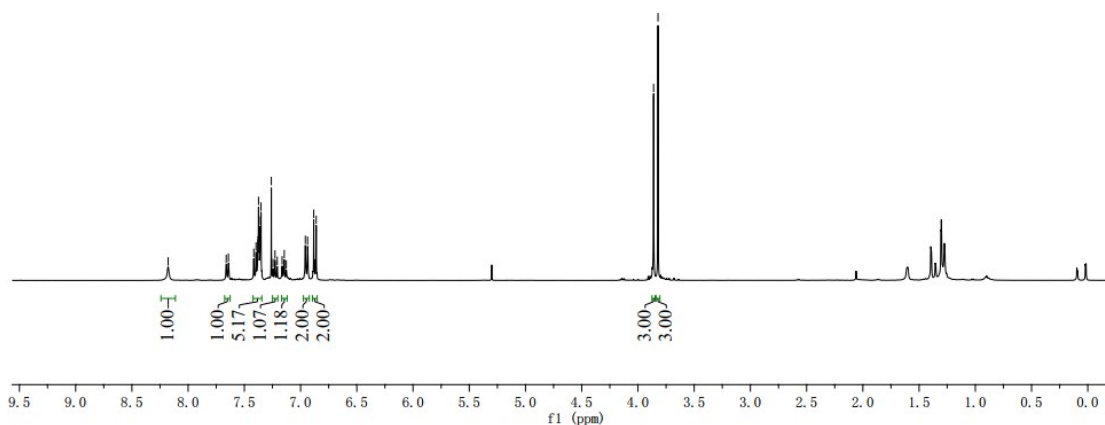

### Compound 3h

PROTON CDCl3 {D:\data\research\new\2020-1-13} nmr 13

8.401  
7.679  
7.666  
7.660  
7.646  
7.626  
7.606  
7.545  
7.528  
7.509  
7.496  
7.475  
7.337  
7.335  
7.320  
7.317  
7.299  
7.297  
7.260  
7.231  
7.229  
7.211  
7.194  
7.192  
1.589

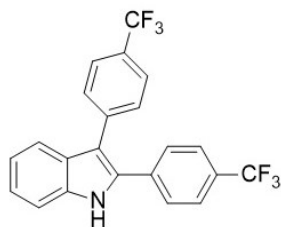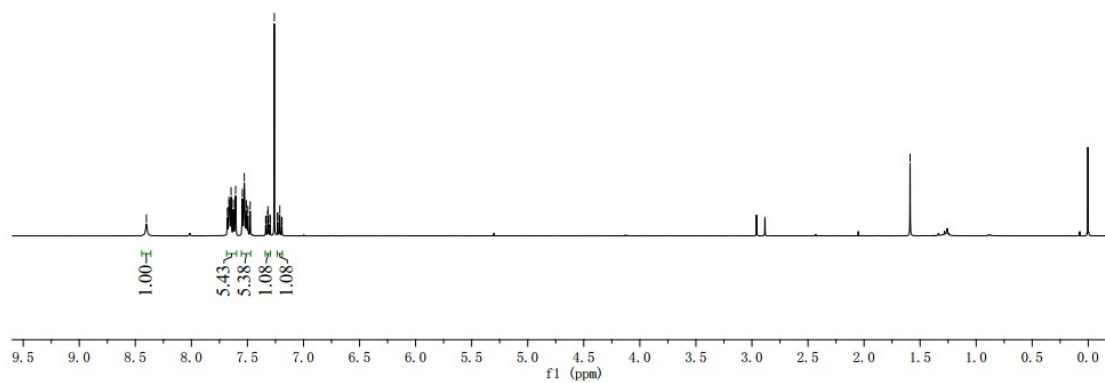

### Compound 3i

PROTON CDC13 {D:\data\research\new\2019-6-10} nmr 10

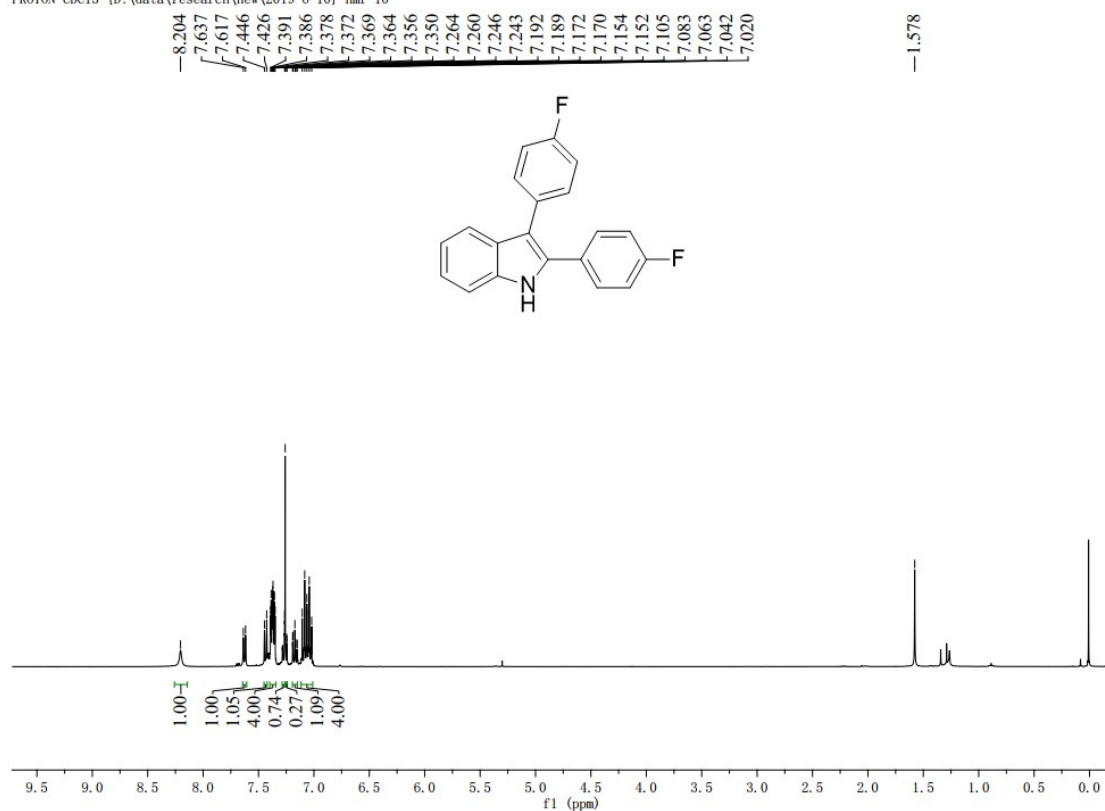

### Compound 3j

PROTON CDC13 {D:\data\research\new\2019-10-15} nmr 34

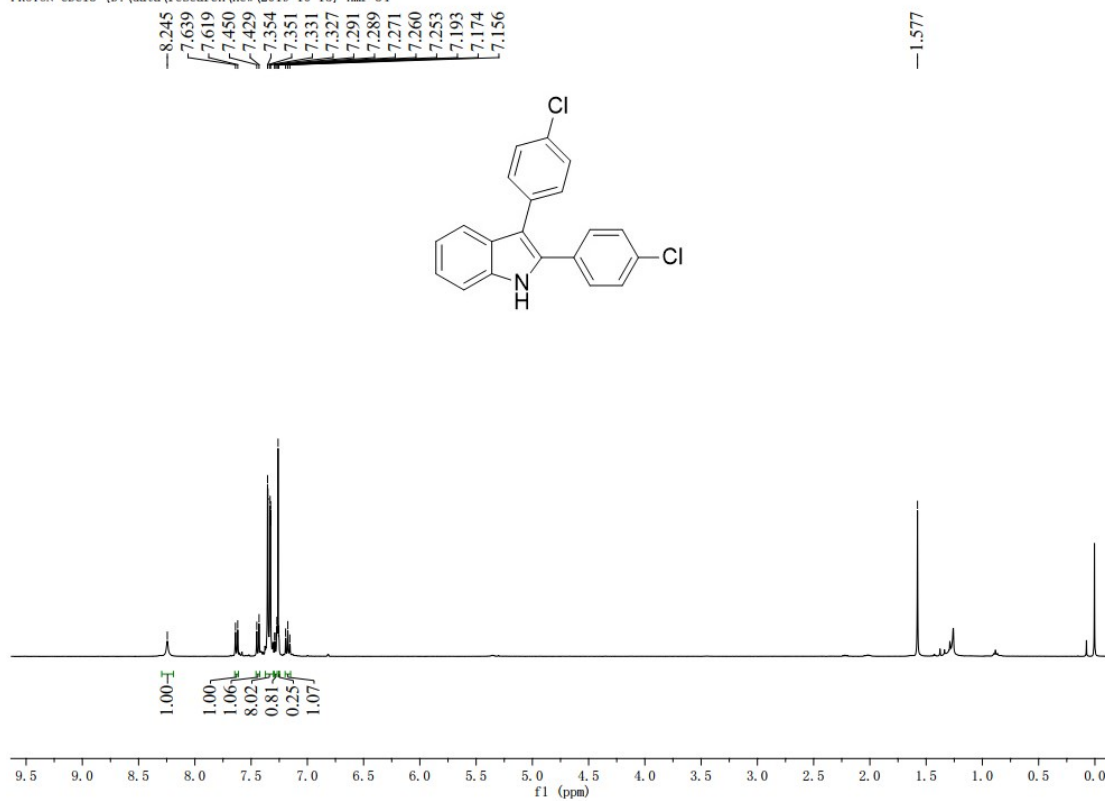

### Compound 3k

PROTON CDC13 {D:\data\research\new\2019-10-11} nmr 7

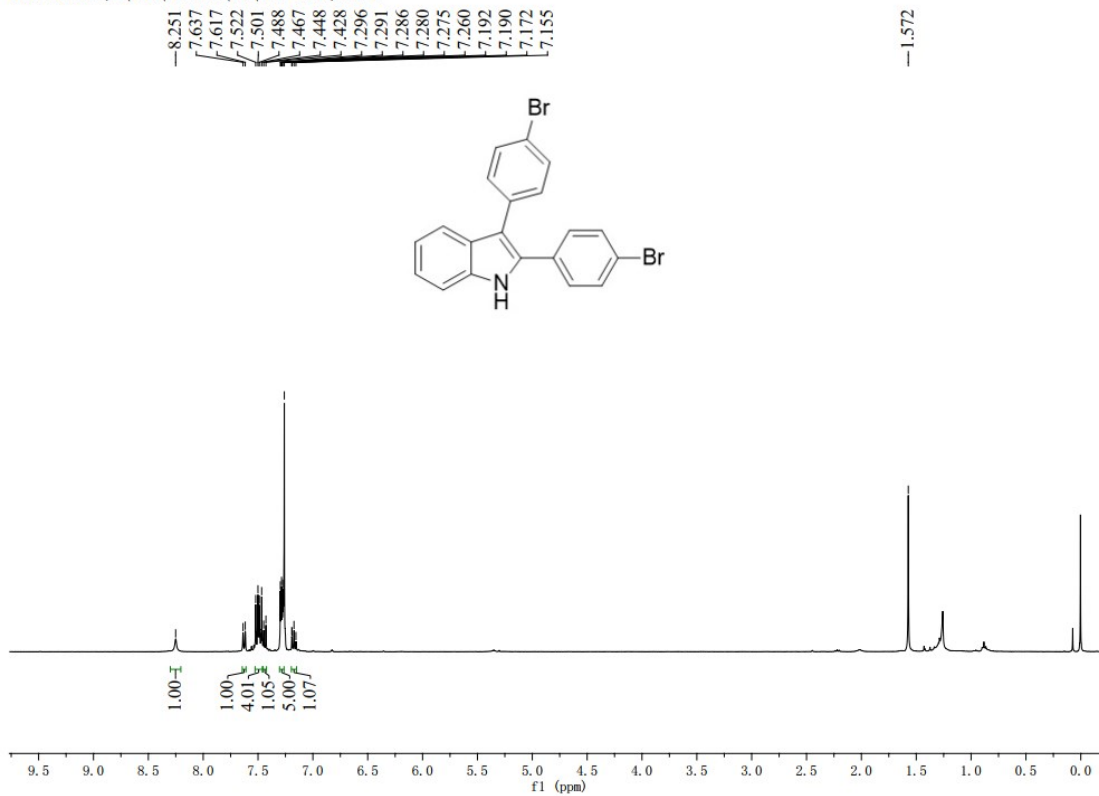

### Compound 3l

PROTON CDC13 {D:\data\research\new\2019-6-14} nmr 36

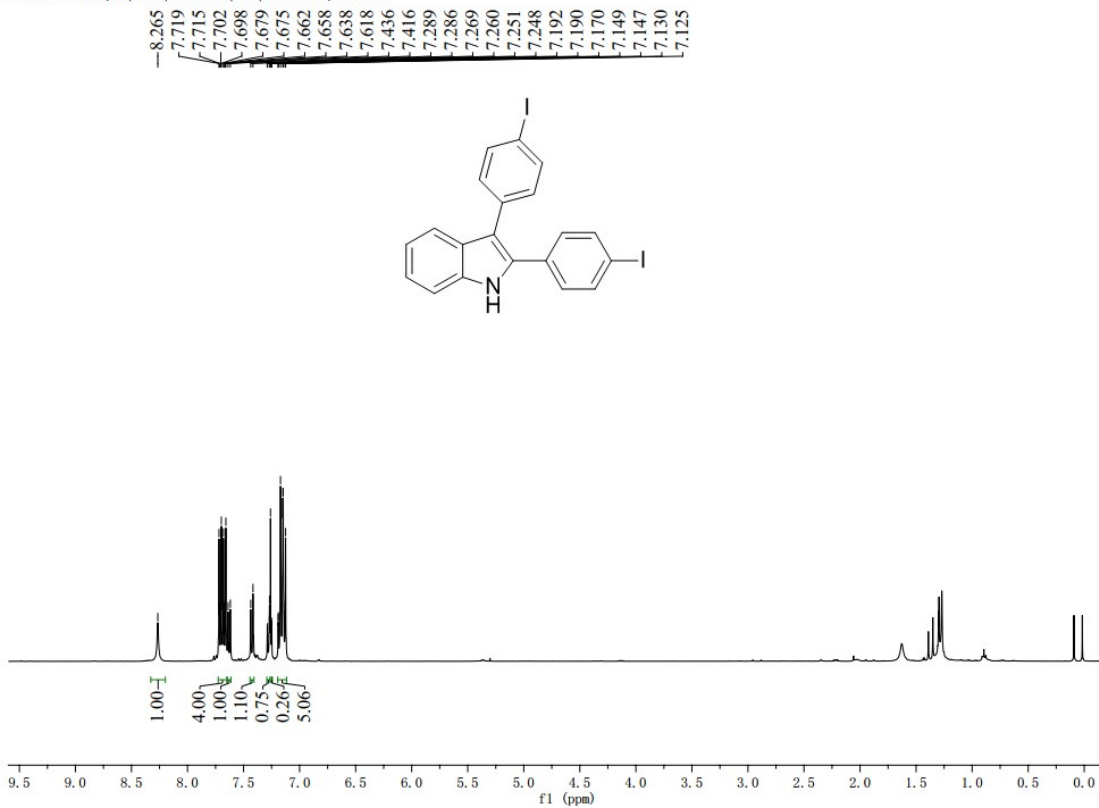

C13CPD CDC13 {D:\data\research\new\2019-6-17} nmr 23

137.838  
137.726  
135.939  
134.259  
133.058  
131.850  
131.690  
129.734  
128.153  
123.114  
120.727  
119.370  
114.192  
111.076  
93.597  
91.790  
77.318  
77.000  
76.682  
65.828

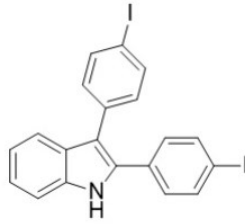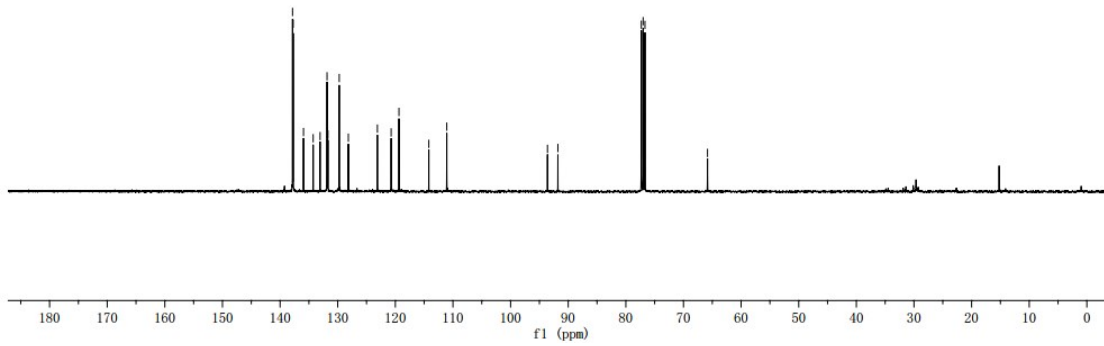

### Compound 3m

PROTON CDC13 {D:\data\research\new\2020-1-13} nmr 18

8.436  
8.066  
8.045  
8.011  
7.990  
7.855  
7.841  
7.835  
7.821  
7.771  
7.750  
7.736  
7.732  
7.718  
7.714  
7.528  
7.508  
7.460  
7.453  
7.442  
7.438  
7.435  
7.424  
7.417  
7.382  
7.369  
7.362  
7.351  
7.326  
7.323  
7.310  
7.306  
7.292  
7.287  
7.268  
7.260  
7.248  
7.169  
7.151  
7.131

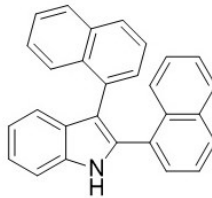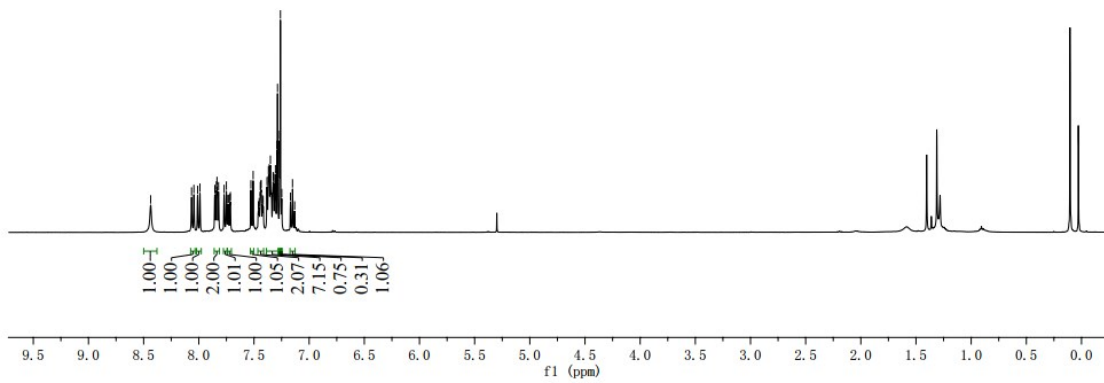

## Compound 3n

PROTON CDC13 (D:\data\research\new\2019-6-6) nmr 49

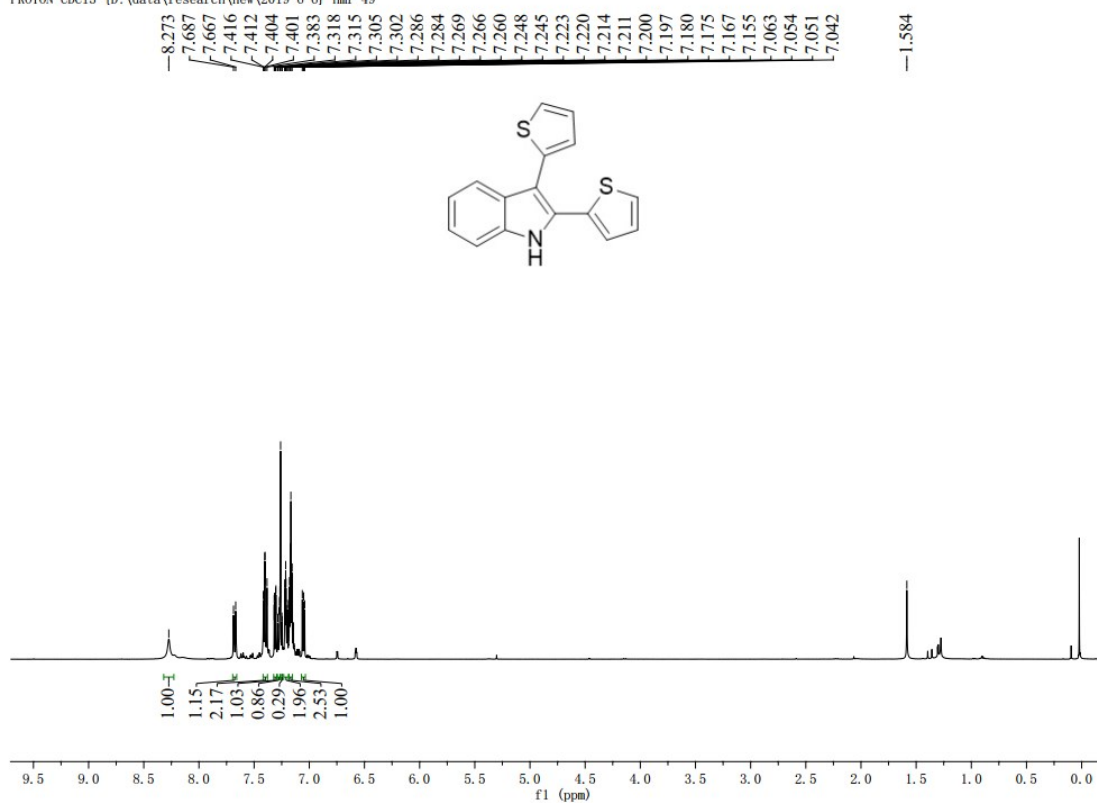

## Compound 3o

PROTON CDC13 (D:\data\research\new\2020-1-15) nmr 45

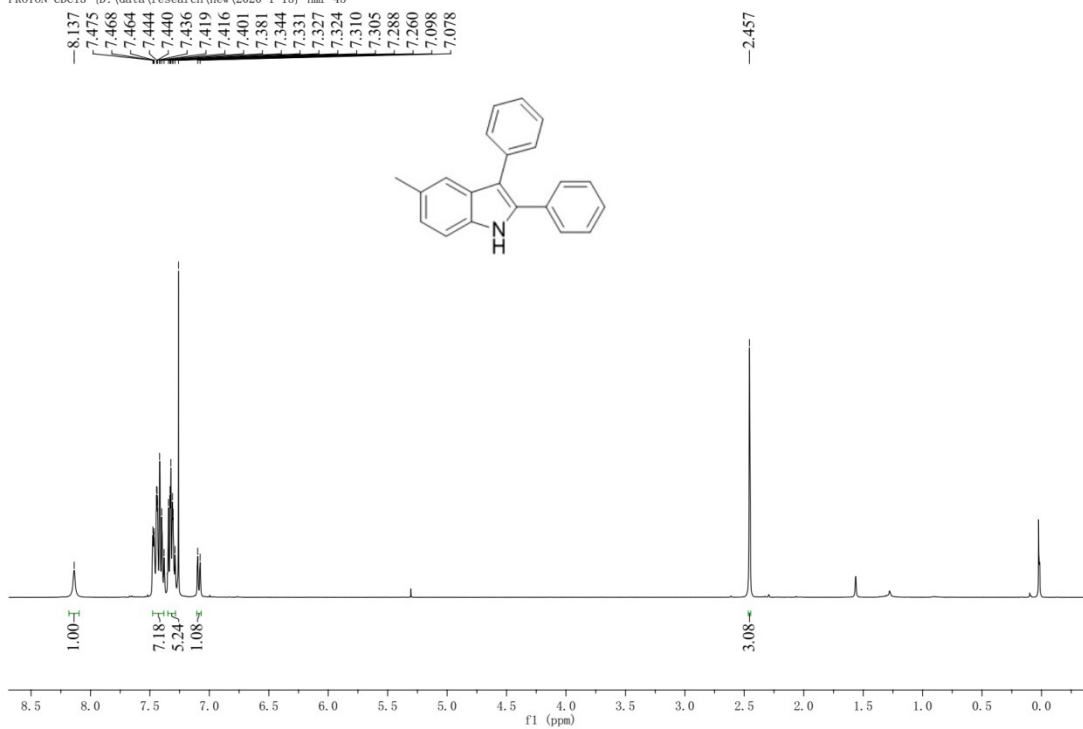



### Compound 3p

PROTON CDC13 {D:\data\research\new\2020-1-8} nmr 14

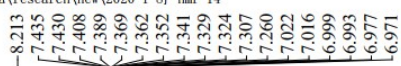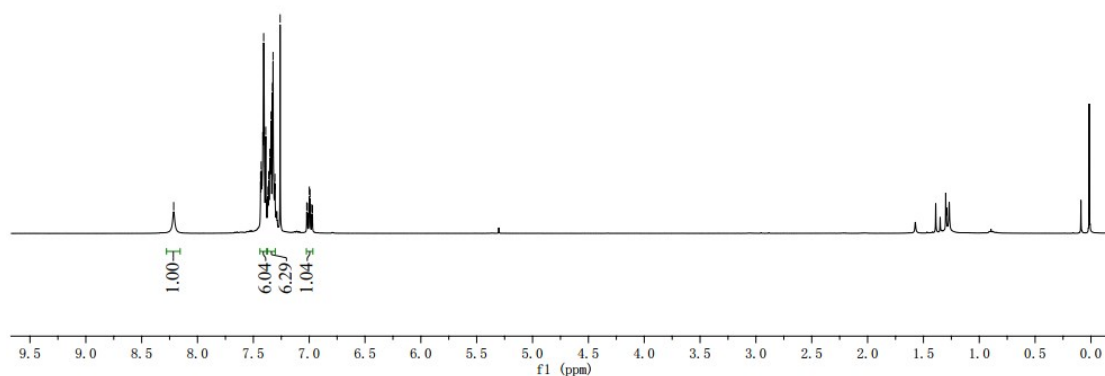

### Compound 3q

PROTON CDC13 {D:\data\research\new\2019-11-15} nmr 27

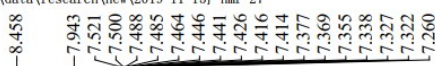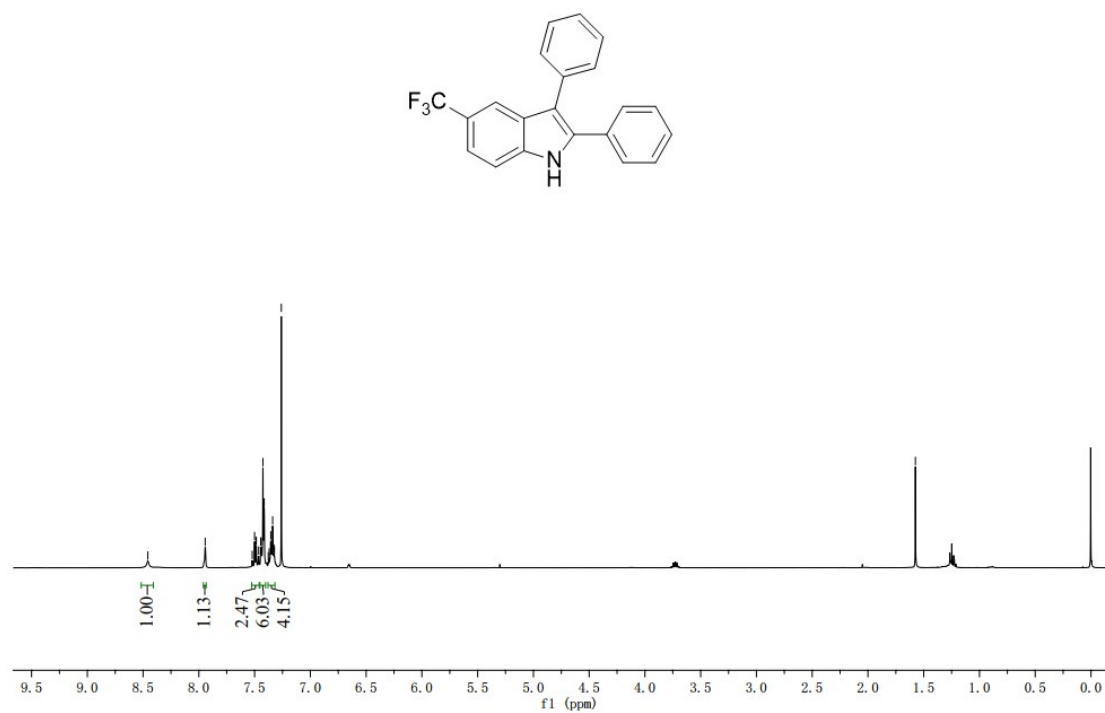

### Compound 3r

PROTON CDCl3 {D:\data\research\new\2019-11-20} nmr 55

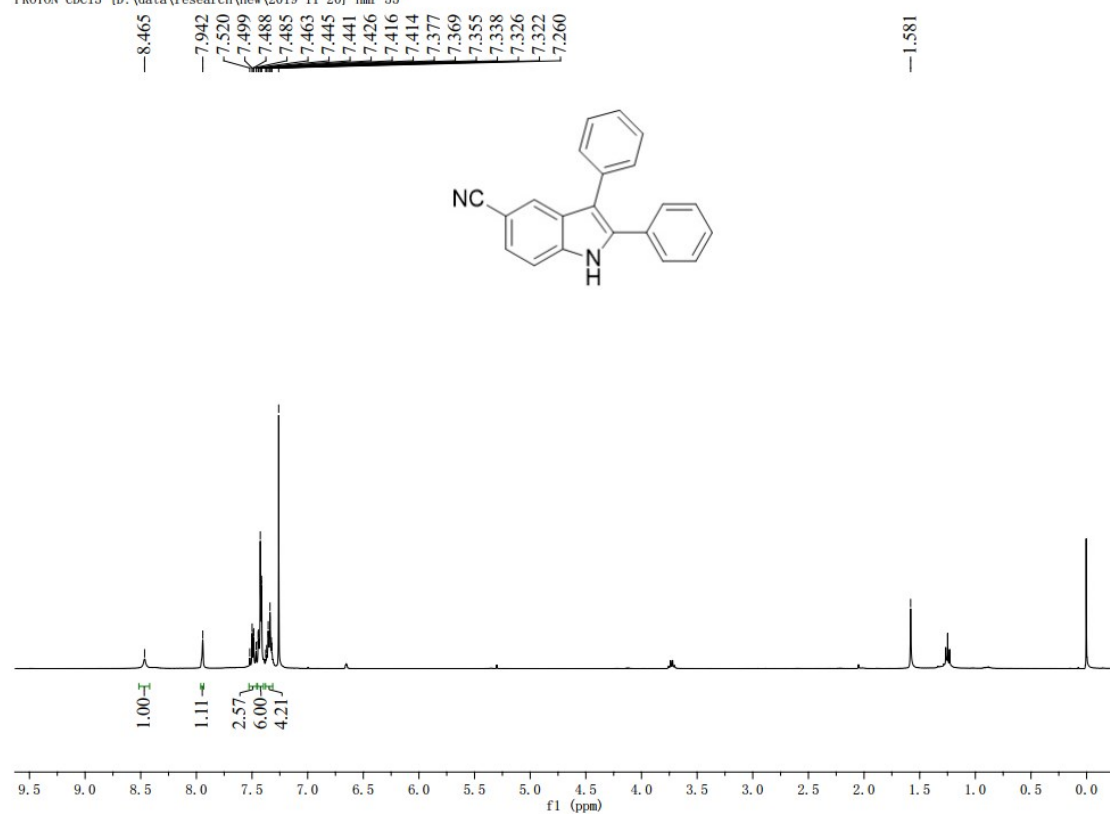

### Compound 4a

PROTON CDCl3 {D:\data\research\new\20190-5-10} nmr 45

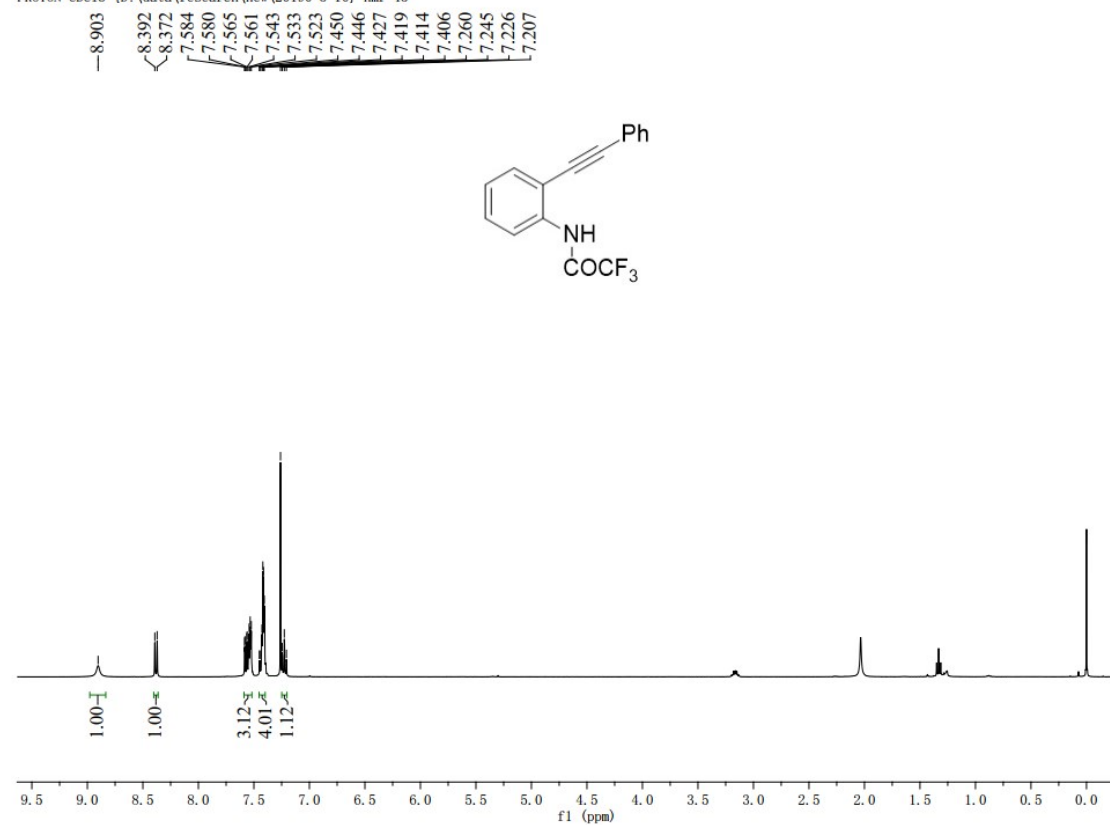

### Compound 5a

PROTON CDC13 {D:\data\research\new\2019-10-24} nmr 9

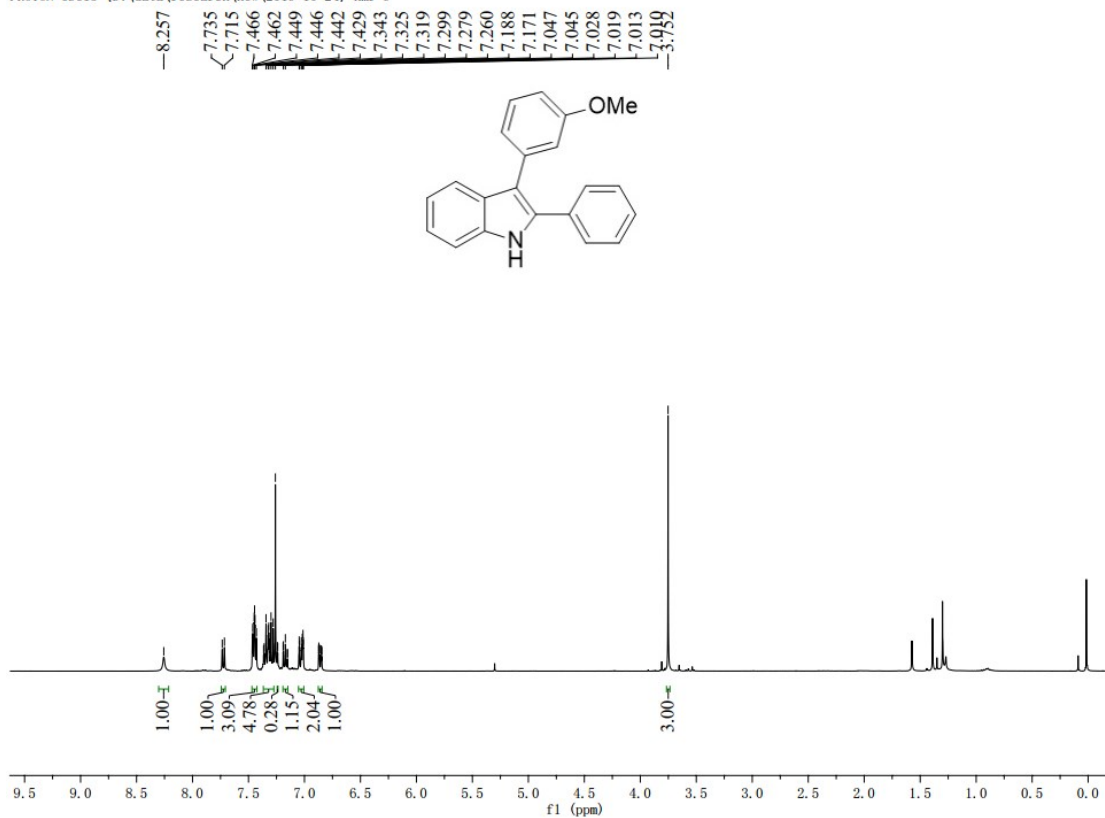

### Compound 5b

PROTON CDC13 {D:\data\research\new\2019-10-12} nmr 26

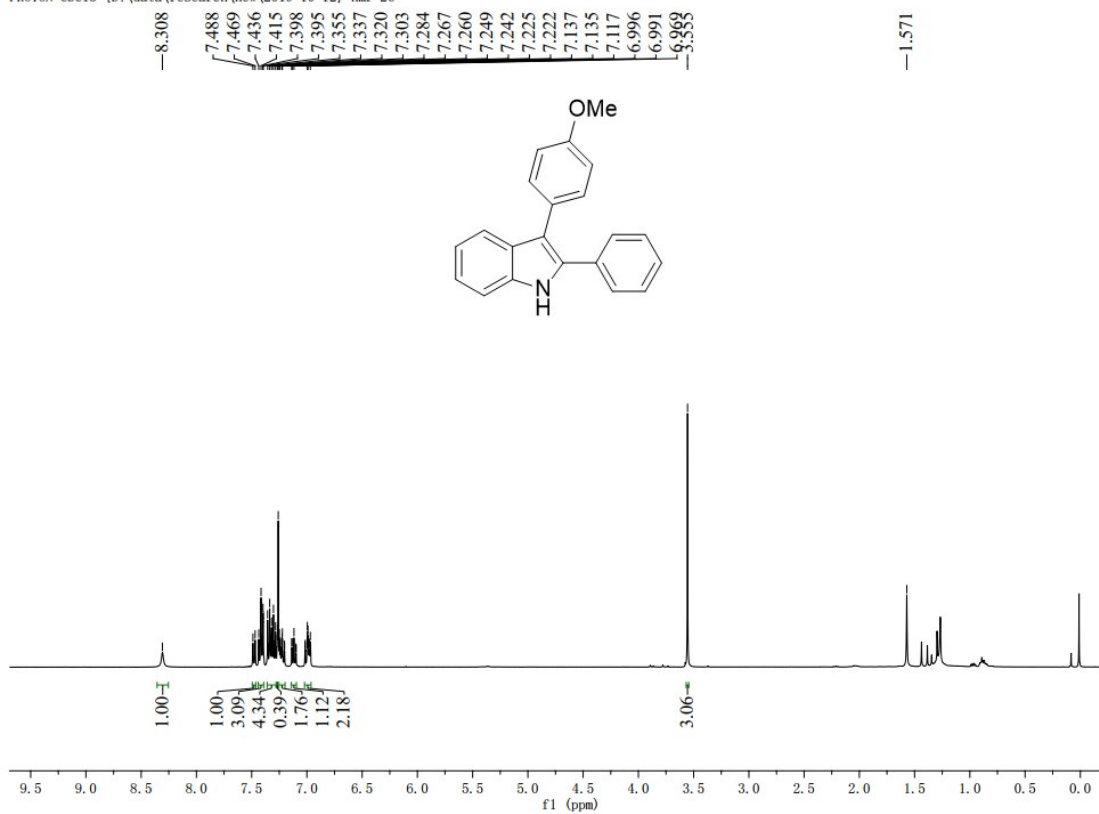

### Compound 5c

PROTON CDC13 {D:\data\research\new\2019-10-25} nmr 39

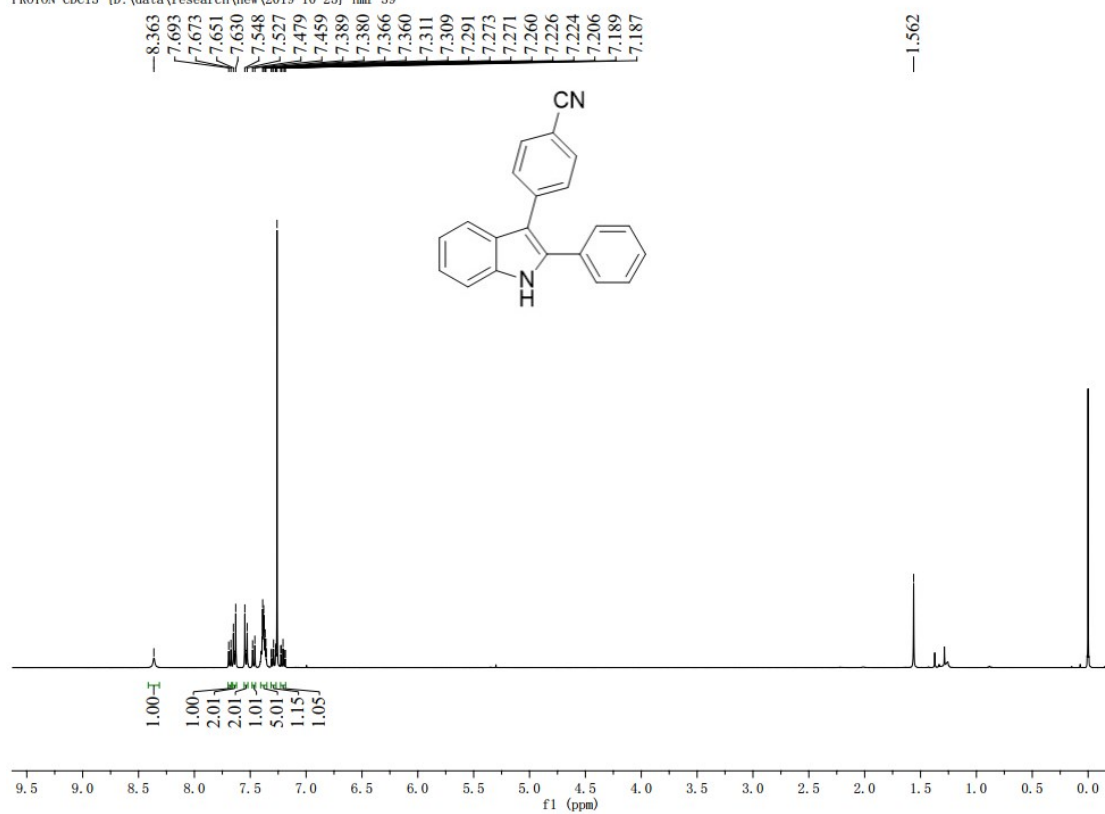

### Compound 5d

PROTON CDC13 {D:\data\research\new\2019-10-24} nmr 10

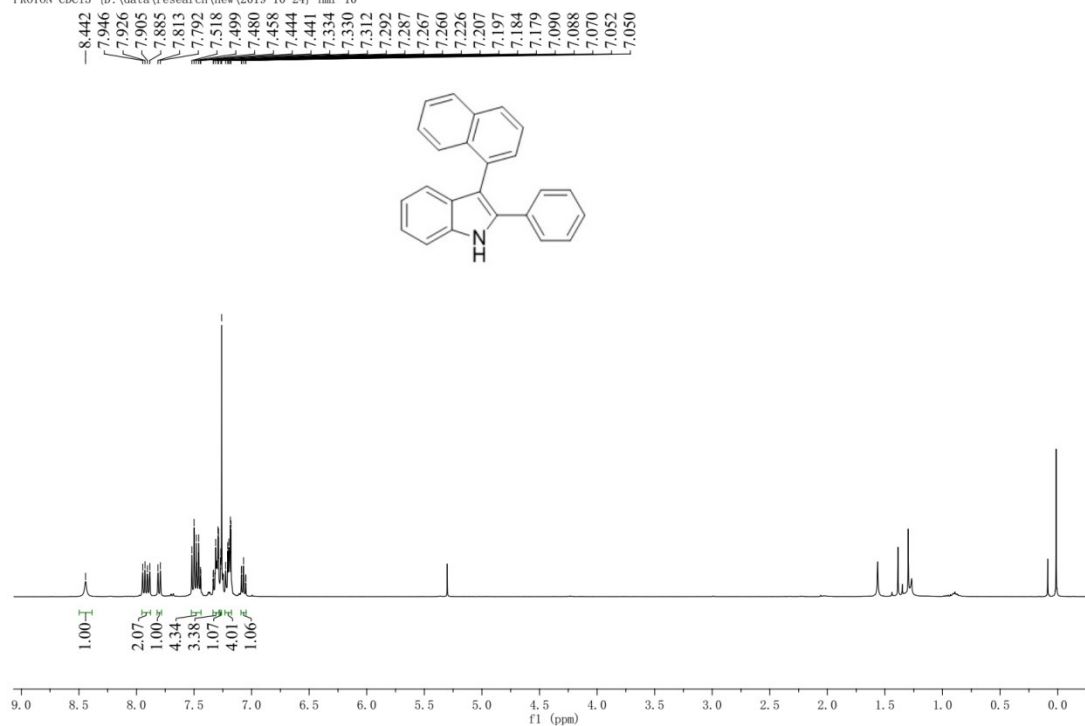

## Compound 5e

PROTON CDCl3 {D:\data\research\new\2019-11-18} nmr 59

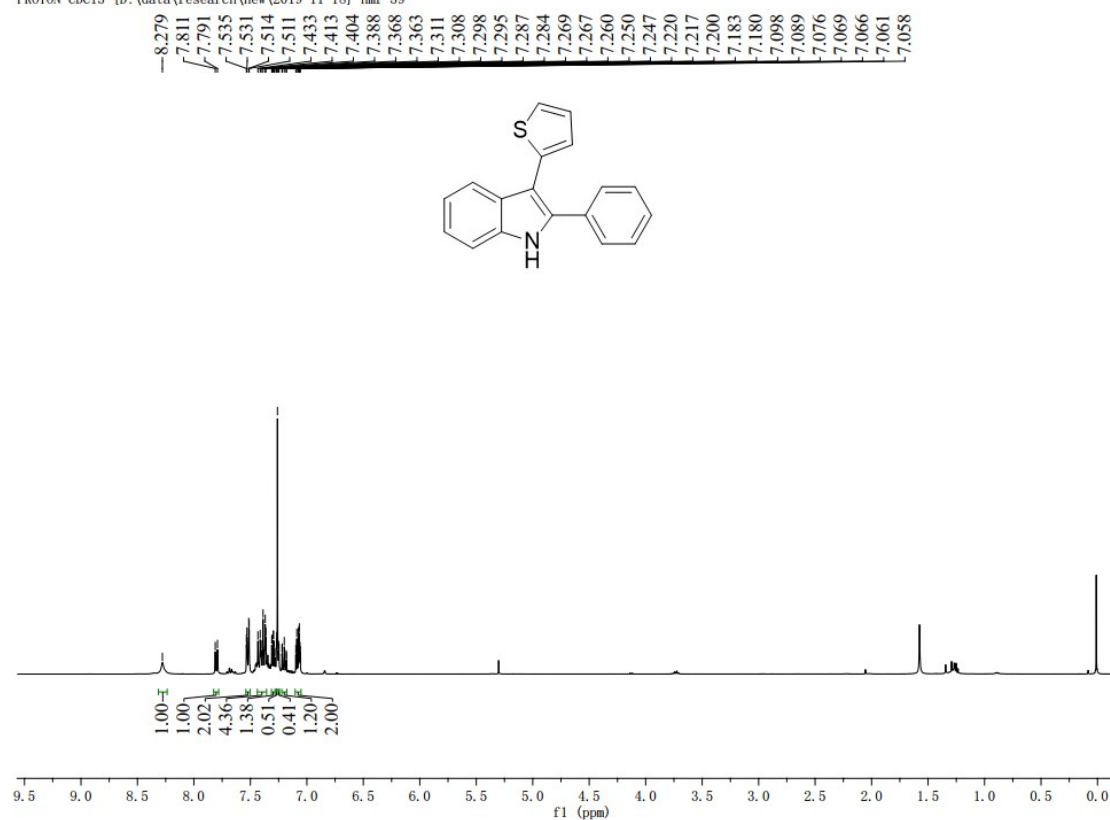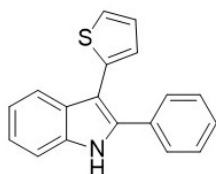

## Compound 5f

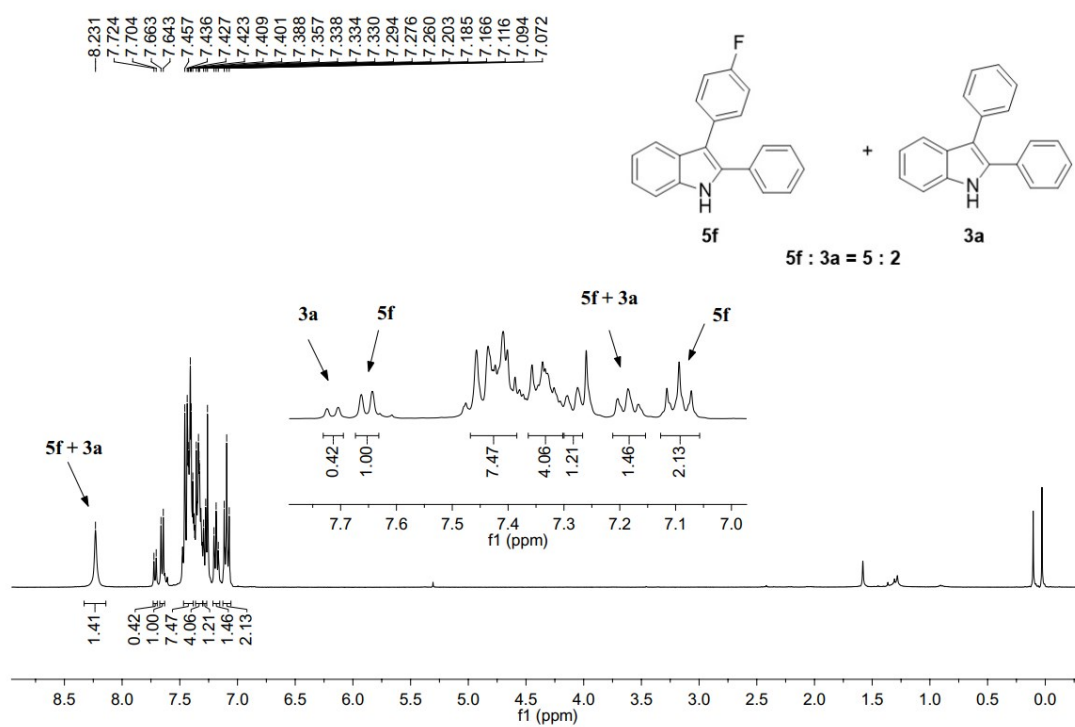

## Compound 5g

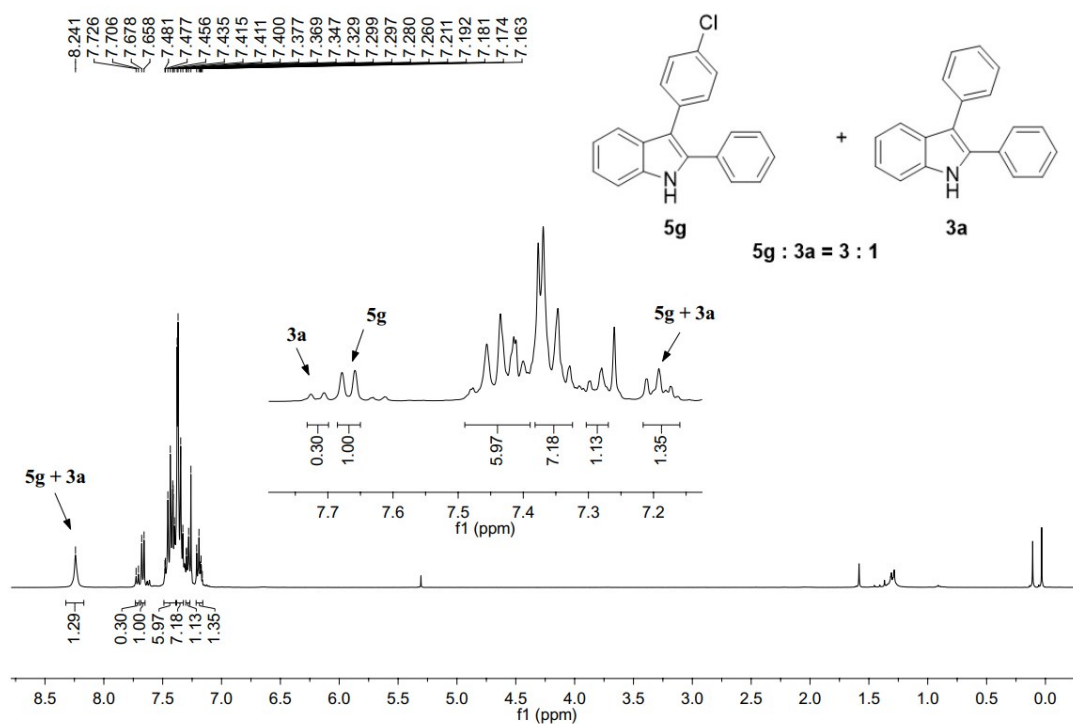

## Compound 5h

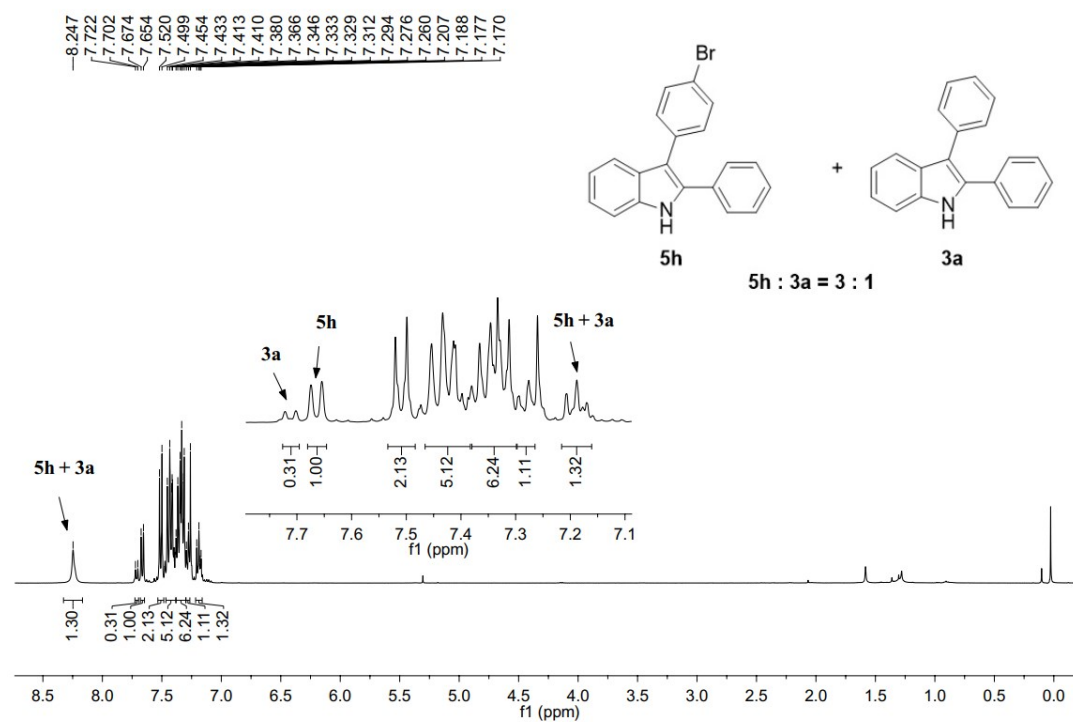

# Compound 5i

PROTON CDCl3 {D:\data\research\new\2020-5-29} nmr 17

9.017  
7.734  
7.714  
7.468  
7.454  
7.450  
7.437  
7.400  
7.381  
7.362  
7.299  
7.295  
7.280  
7.275  
7.265  
7.260  
7.247  
7.230  
7.164  
7.144  
7.126  
7.025  
7.005  
6.841  
6.822  
6.803  
-3.869

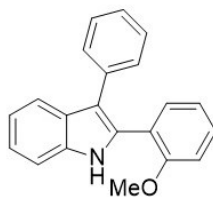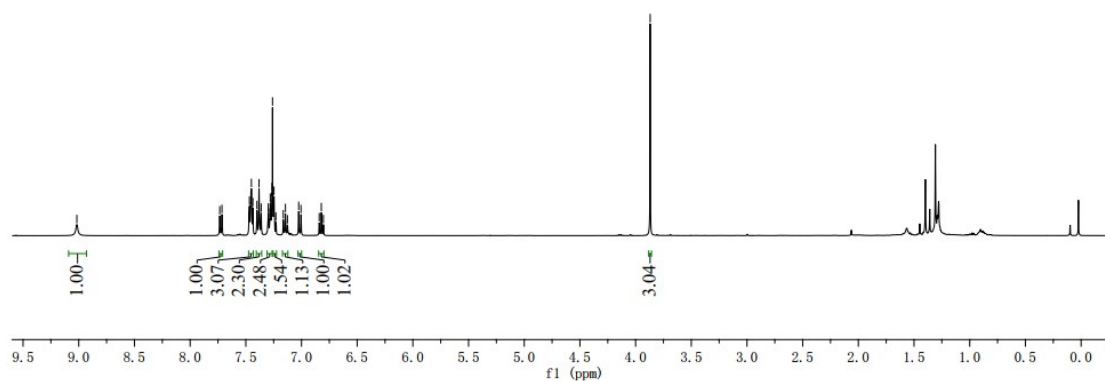

C13CPD CDCl3 {D:\data\research\new\2020-6-22} nmr 18

156.703  
135.827  
135.428  
132.009  
131.135  
130.060  
128.988  
128.417  
127.789  
125.953  
122.361  
120.938  
120.820  
119.873  
119.368  
115.679  
111.559  
110.737  
77.317  
77.000  
76.682  
55.669  
55.629  
26.889

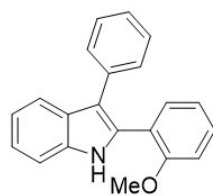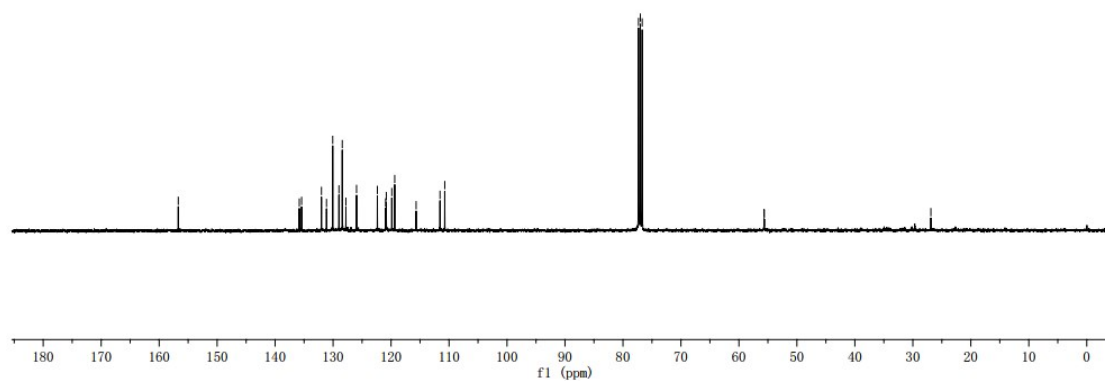

# Compound 5j

PROTON CDC13 {D:\data\research\new\2020-6-19} nmr 7

8.285  
7.685  
7.665  
7.585  
7.563  
7.539  
7.519  
7.473  
7.453  
7.423  
7.416  
7.408  
7.355  
7.348  
7.333  
7.310  
7.307  
7.292  
7.289  
7.271  
7.269  
7.260  
7.197  
7.195  
7.177  
7.159  
7.157

1.567

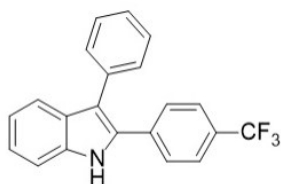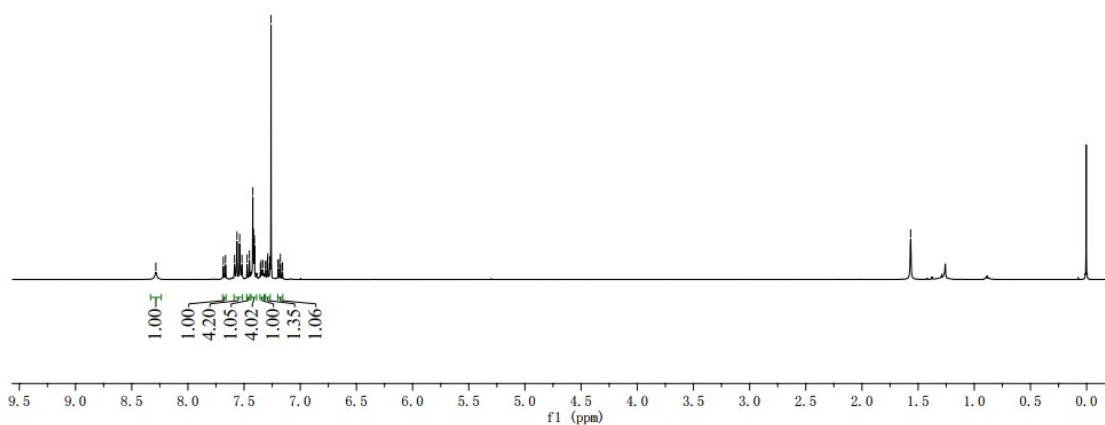

C13CPD CDC13 {D:\data\research\new\2020-6-22} nmr 21

136.139  
134.440  
132.235  
130.108  
129.435  
129.112  
128.746  
128.673  
128.100  
126.694  
125.621  
125.584  
125.546  
125.509  
125.421  
123.385  
122.716  
120.729  
119.977  
116.582  
111.079  
77.318  
77.000  
76.683

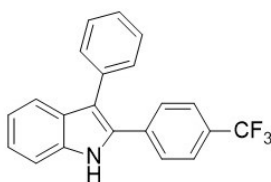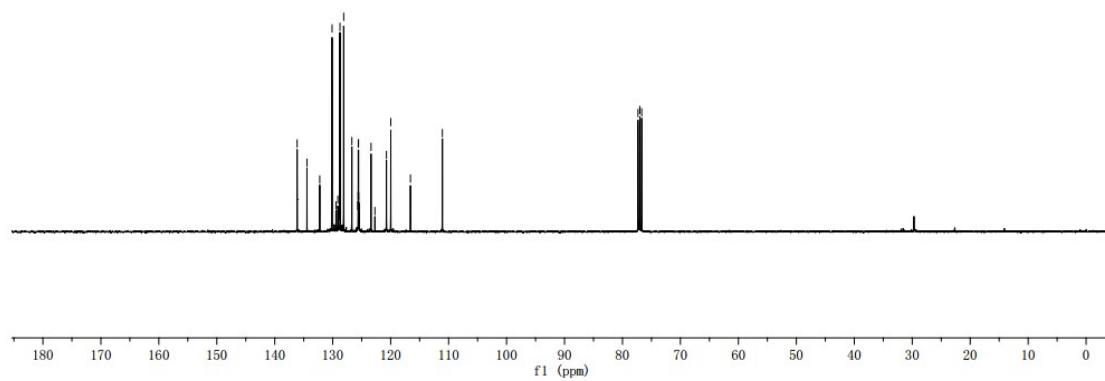



F19CPD CDC13 {D:\data\research\new\2020-6-24} nmr 43

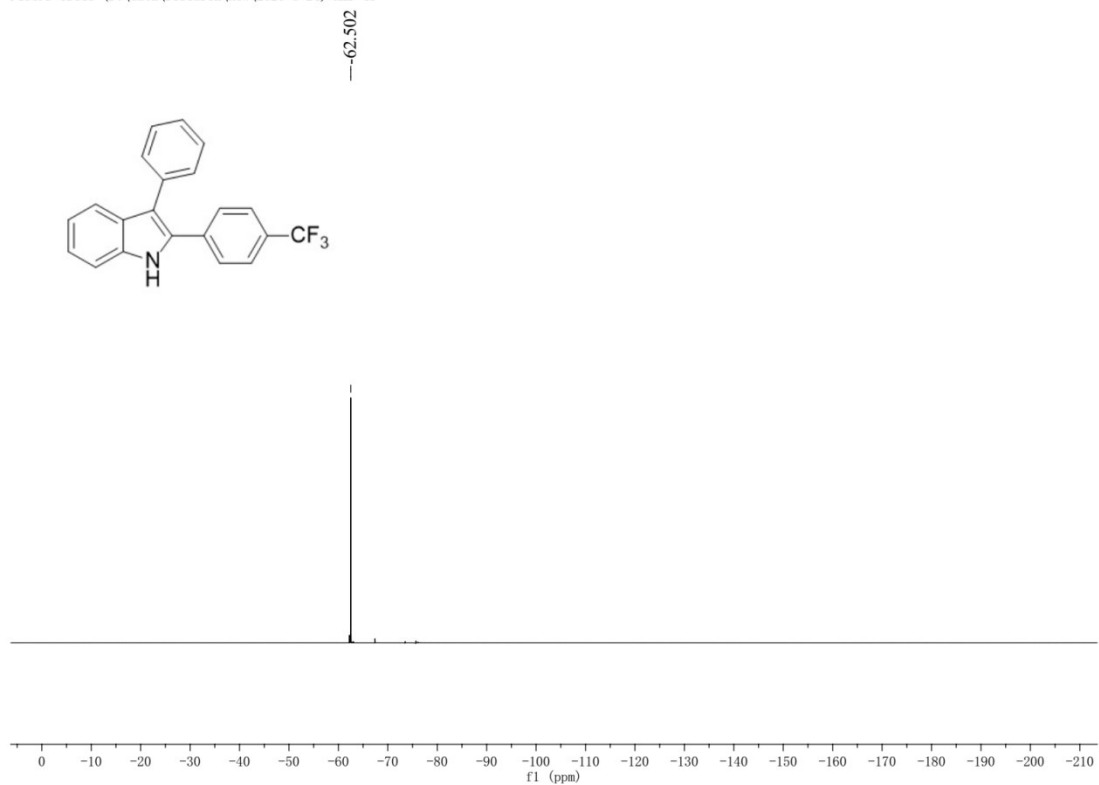

### Compound 5k

PROTON CDC13 {D:\data\research\new\2020-6-22} nmr 48

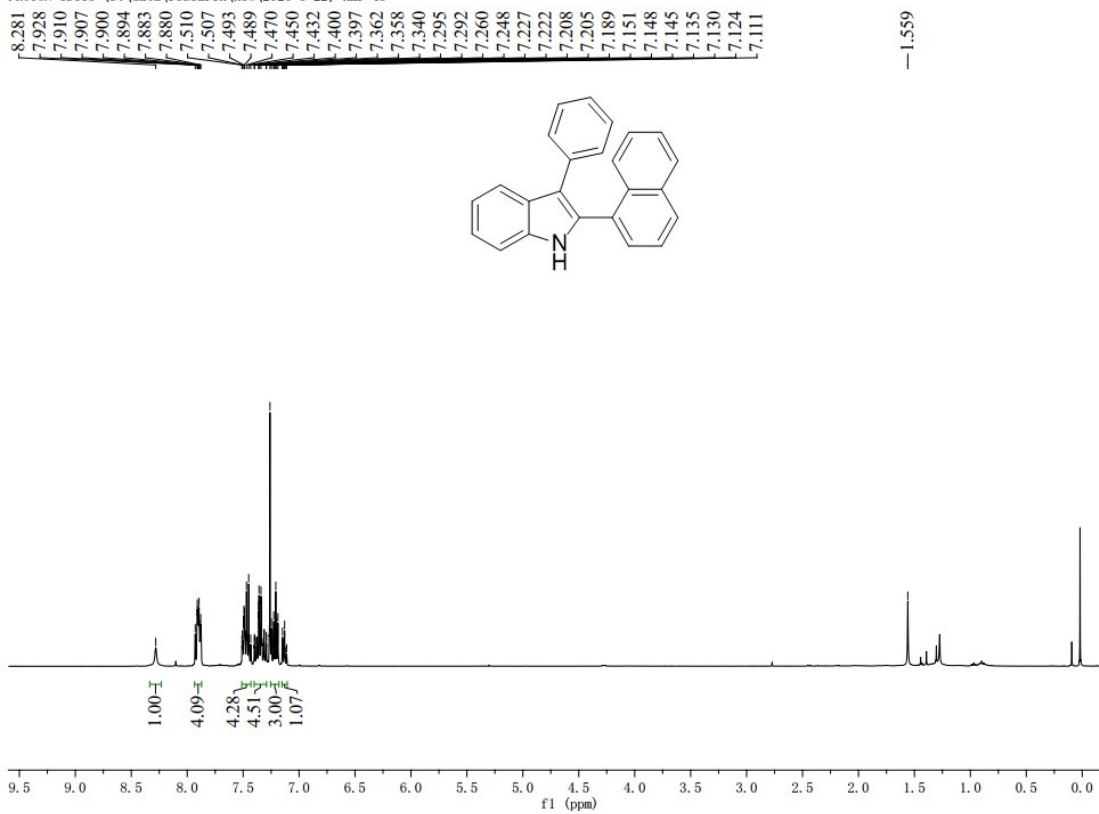

C13CPD CDC13 {D:\data\research\new\2020-6-22} nmr 22

135.852  
134.911  
133.627  
133.181  
132.181  
130.540  
129.216  
128.774  
128.248  
128.218  
127.477  
126.456  
126.017  
125.907  
125.678  
125.289  
122.512  
120.366  
119.724  
116.629  
110.903  
77.318  
77.000  
76.682

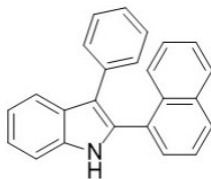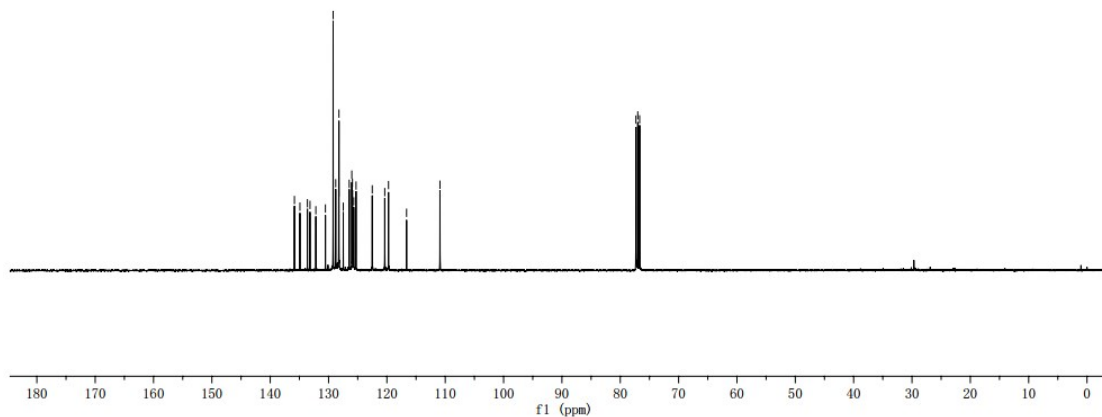

## Compound 6

PROTON CDC13 {D:\data\research\new\2019-12-30} nmr 15

7.599  
7.593  
7.587  
7.576  
7.392  
7.381  
7.379  
7.369  
7.260  
7.179  
7.169  
7.156  
5.860  
5.856  
5.841  
5.838  
5.832  
5.288  
5.186  
5.163  
5.161  
5.136  
5.833  
3.864  
3.847  
3.828  
3.308

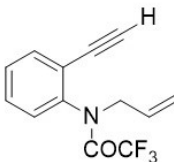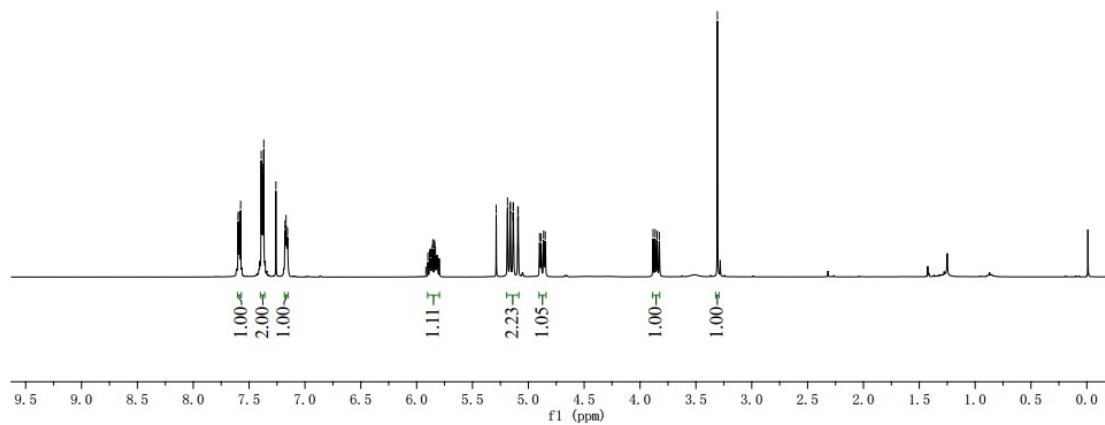

C13GD CDC13 [D:\data\research\new\2020-7-10] nmr 23

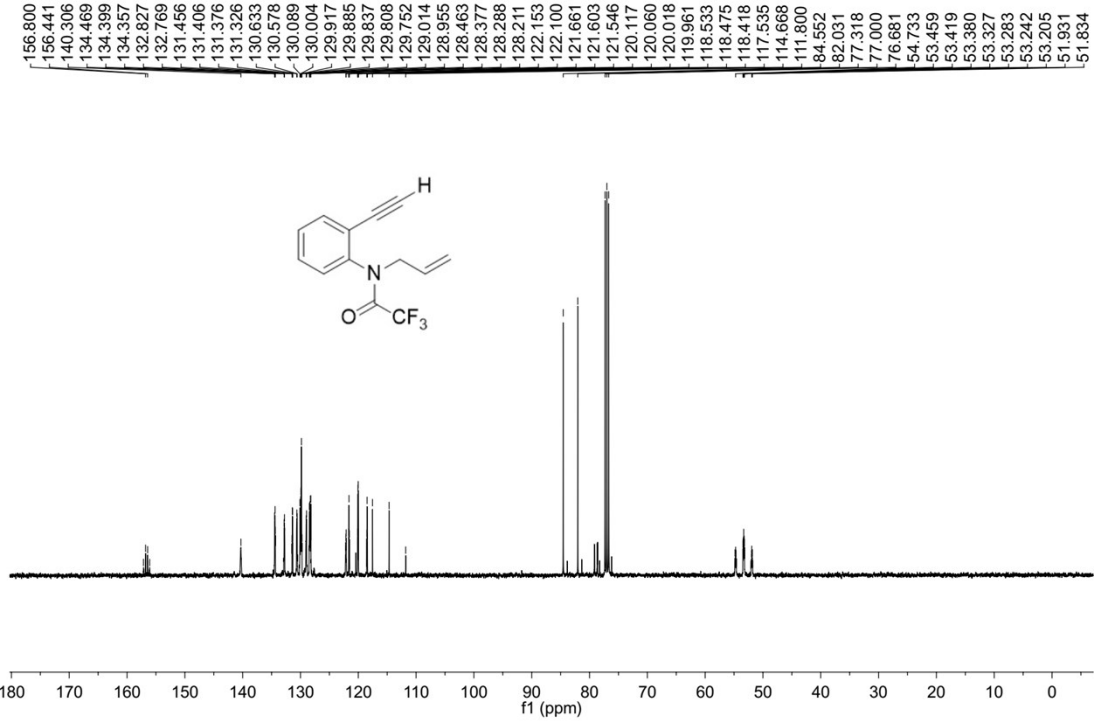

ju-wgd-001  
F19CPD CDC13 [D:\data\research\new\2020-7-10] nmr 16

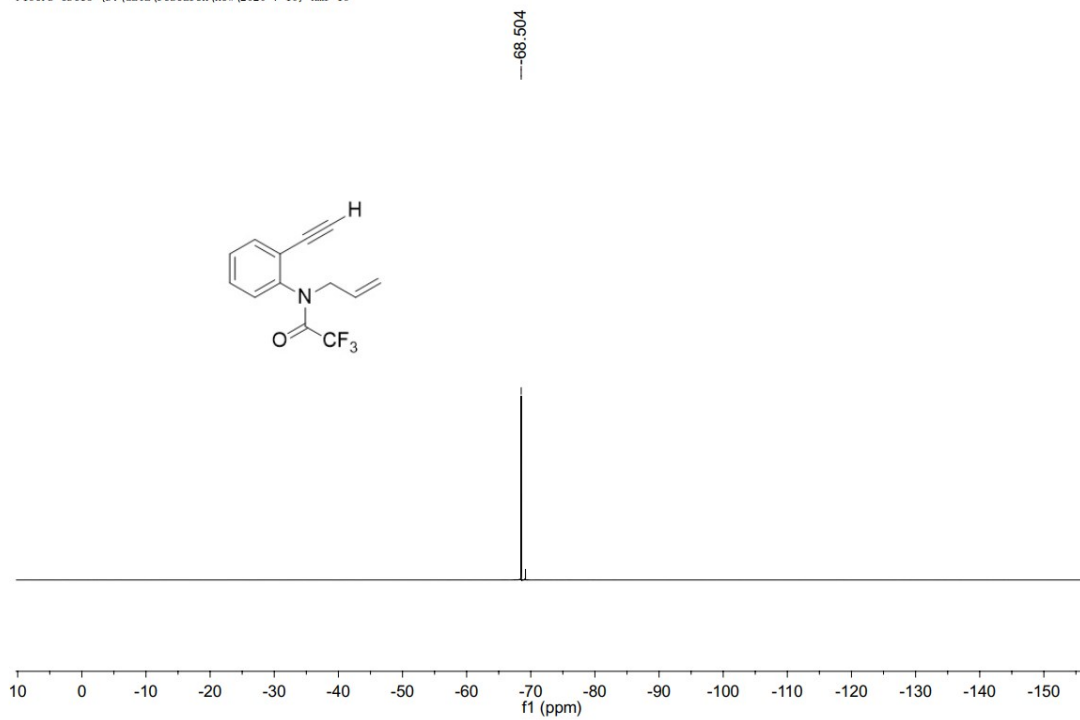

## Compound 7

PROTON CDC13 {D:\data\research\new\2020-1-8} nmr 18

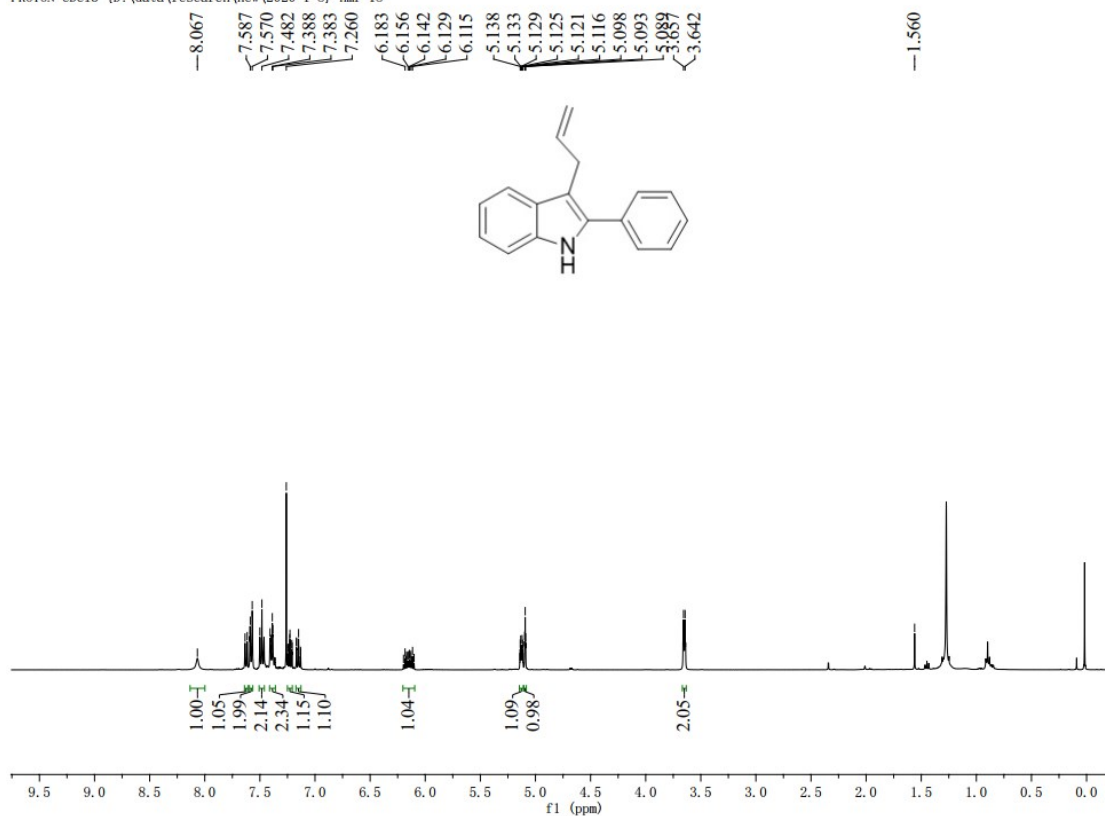

## Compound 8

PROTON CDC13 {D:\data\research\new\2020-1-13} nmr 16

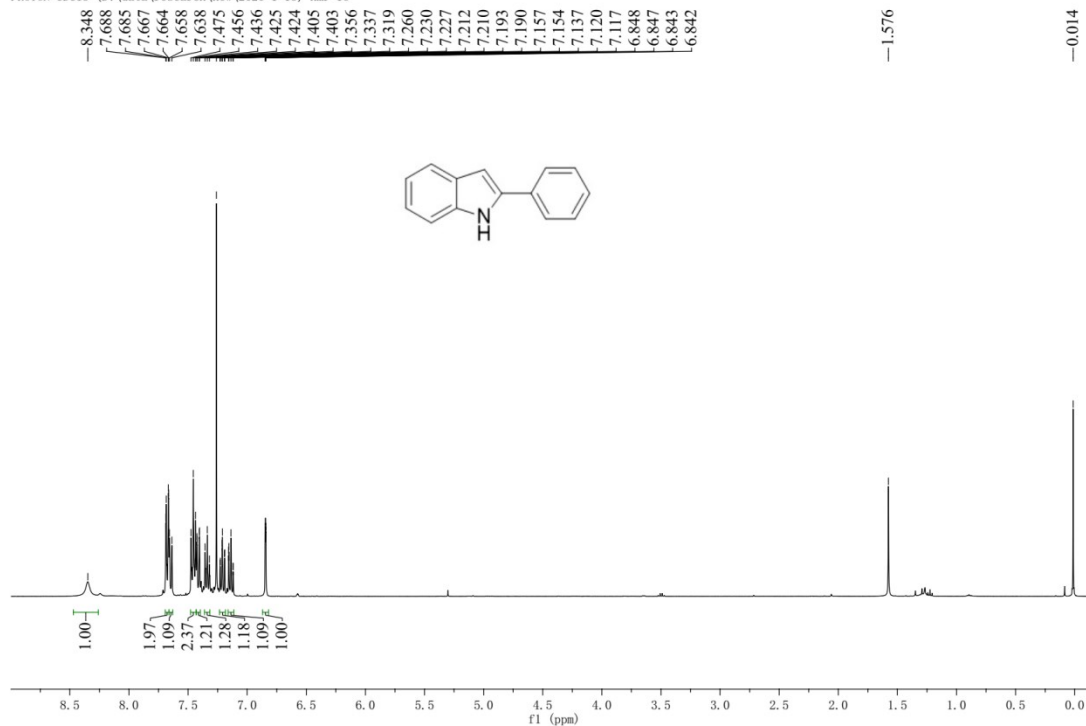

Supplement: d0ob02295k1.pdf [file d0ob02295k1.pdf]
